# Supplementary material
Source: PubMed Central journal article supplement (PMC5577364)
Supplement: NIHMS859941-supplement-1.pdf [file NIHMS859941-supplement-1.pdf]

## SUPPLEMENTARY INFORMATION

### **A Scalable Platform to Identify Fungal Secondary Metabolites and Their Gene Clusters**

Kenneth D. Clevenger<sup>1,4,7</sup>, Jin Woo Bok<sup>2,7</sup>, Rosa Ye<sup>3,7</sup>, Galen P. Miley<sup>1</sup>, Maria H. Verdan<sup>1</sup>, Thomas Velk<sup>2</sup>, Cynthia Chen<sup>3</sup>, KaHoua Yang<sup>2</sup>, Matthew T. Robey<sup>5</sup>, Peng Gao<sup>4</sup>, Matthew Lamprecht<sup>3</sup>, Paul M. Thomas<sup>4,5</sup>, Md Nurul Islam<sup>3</sup>, Jonathan M. Palmer<sup>6</sup>, Chengcang C. Wu<sup>3</sup>, Nancy P. Keller<sup>2</sup>, and Neil L. Kelleher<sup>1,4,5</sup>

<sup>1</sup>Department of Chemistry, Northwestern University, Evanston, Illinois, USA.

<sup>2</sup>Department of Medical Microbiology and Immunology and Department of Bacteriology, University of Wisconsin-Madison, Madison, Wisconsin, USA.

<sup>3</sup>Intact Genomics, Inc. St Louis, Missouri, USA.

<sup>4</sup>Proteomics Center of Excellence, Northwestern University, Evanston, Illinois, USA.

<sup>5</sup>Department of Molecular Biosciences, Northwestern University, Evanston, Illinois, USA.

<sup>6</sup>Center for Forest Mycology Research, Northern Research Station, US Forest Service, Madison, WI, 53726

<sup>7</sup>These authors contributed equally to this work. Correspondence should be addressed to C.C.W. (cwu@intactgenomics.com), N.P.K. (npkeller@wisc.edu), or N.L.K. (n-kelleher@northwestern.edu)

## SUPPLEMENTARY RESULTS

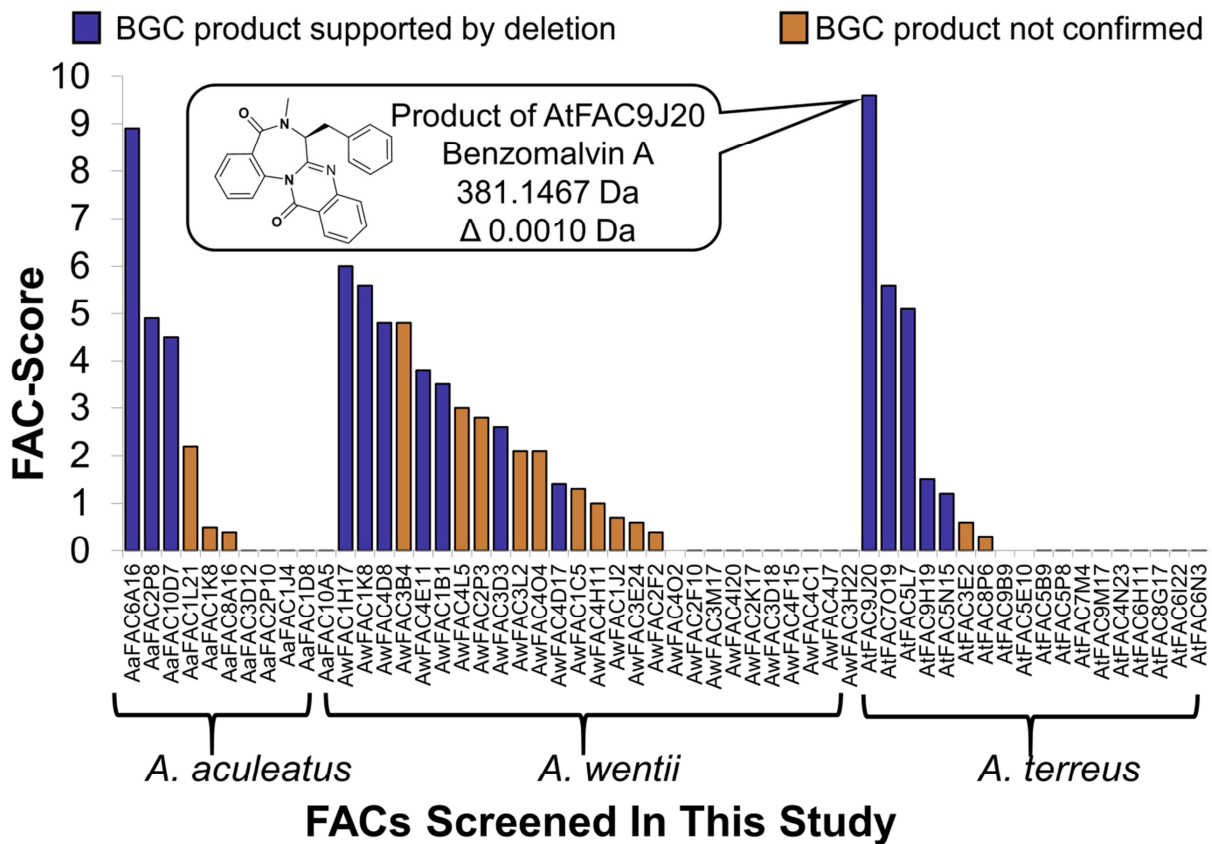

**Supplementary Figure 1. FACs screened in this study.** Bars show the FAC-Score of the top scoring compound from each FAC, reflecting a ~30% success rate (15/56 FACs) for expression and detection of the heterologous metabolite of FAC-strains in this study. Brown bars represent high scoring compounds which were present at trace levels in negative controls (or for one case was refuted by backbone deletions within the FAC). Blue bars represent FAC-encoded secondary metabolites, confirmed by manual analysis of controls and validation by genetic deletions. FACs without visible bars lacked compounds with positive FAC-Scores. The inset highlights the deorphanized and overexpressed secondary metabolite, benzomalvin A, which is encoded by AtFAC9J20.

**Supplementary Figure 2. FAC produced metabolites and their clusters.** Confirmatory data are shown for the 17 unique compounds from 15 FACs reported to produce unique SM products. For each FAC in panels **a-q**, the gene cluster diagram for the cluster contained in the FAC is shown, along with a table of ORFs with predicted biosynthetic functions. The MS<sup>1</sup> of each FAC metabolite is also shown, along with the selected ion chromatogram for that metabolite from the FAC, its deletant, and its parent strain. The backbone gene subjected to deletion for empirical validation is highlighted by a red box in each case. Panels **c-q** are continued below.

**A) FAC: AtFAC9J20 (103 kb)**

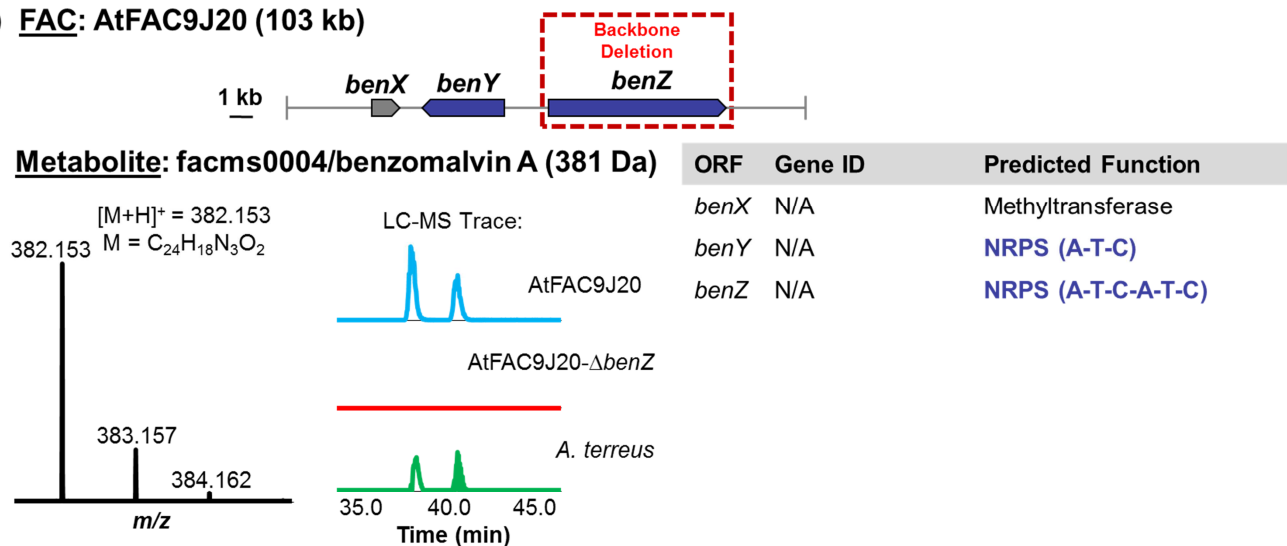

**B) FAC: AtFAC9J20 (103 kb)**

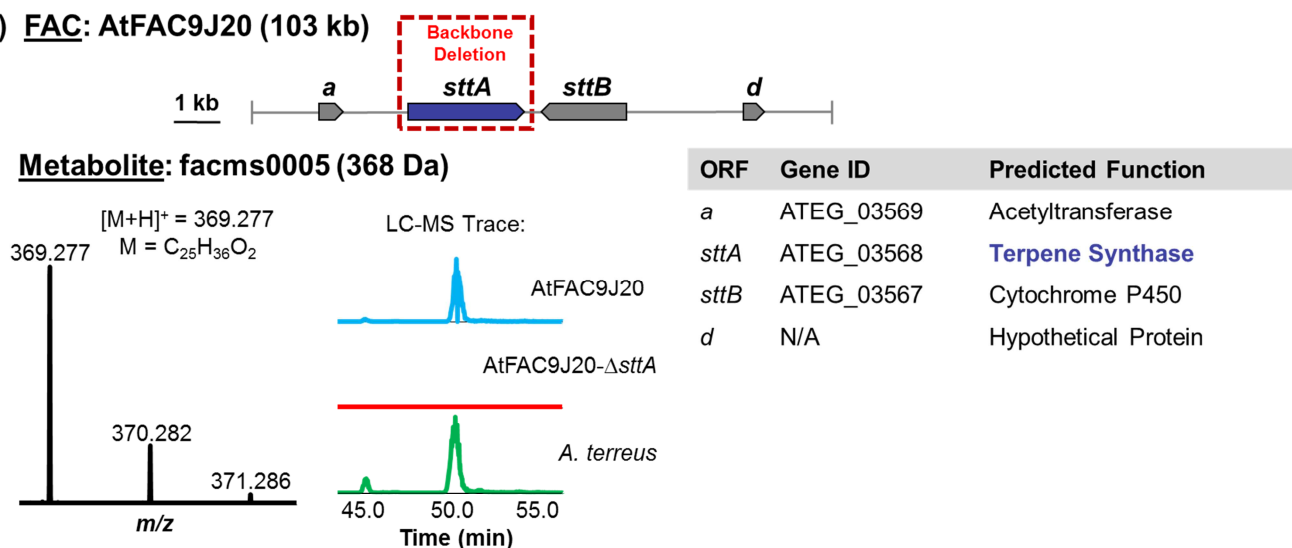

C) **FAC: AtFAC9J20 (103 kb)**

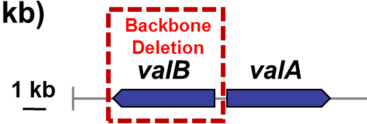

**Metabolite: facms0017/valactamide A (506 Da)**

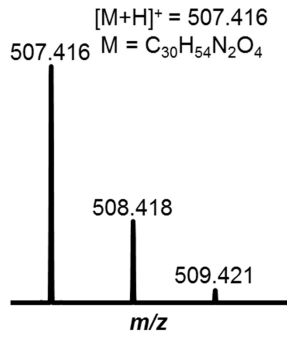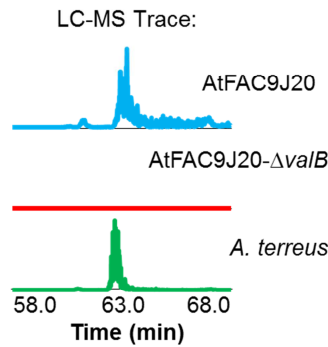

| ORF         | Gene ID                   | Predicted Function               |
|-------------|---------------------------|----------------------------------|
| <i>valB</i> | ATEG_03576                | <b>NRPS (C-A-T-C-A-T-C)</b>      |
| <i>valA</i> | ATEG_03575,<br>ATEG_03574 | <b>PKS (KS-AT-DH-MT-ER-KR-T)</b> |

D) **FAC: AtFAC9H19 (96 kb)**

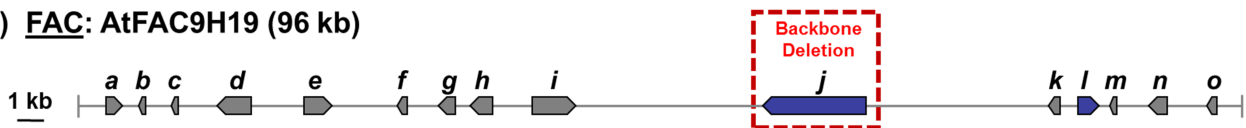

**Metabolite: facms0007 (610 Da)**

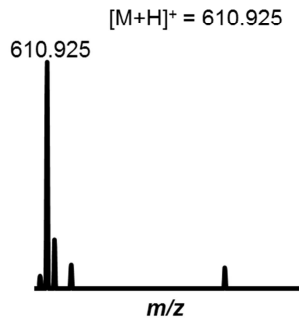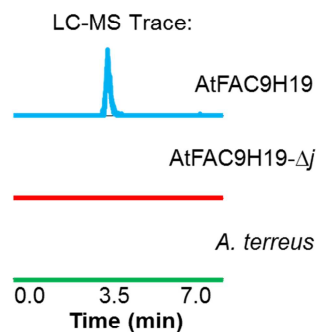

| ORF      | Gene ID    | Predicted Function         |
|----------|------------|----------------------------|
| <i>a</i> | ATEG_07076 | MFS Transporter            |
| <i>b</i> | ATEG_07075 | Kinesin-Like               |
| <i>c</i> | ATEG_07074 | Muramidase                 |
| <i>d</i> | ATEG_07073 | LysM Domain-Containing     |
| <i>e</i> | ATEG_07072 | Glycosyl Hydrolase         |
| <i>f</i> | ATEG_07071 | Tetratricopeptide Repeat   |
| <i>g</i> | ATEG_07070 | WD Domain-Containing       |
| <i>h</i> | ATEG_07069 | Hypothetical Protein       |
| <i>i</i> | ATEG_07068 | F-Box Domain Protein       |
| <i>j</i> | ATEG_07067 | <b>PKS (KS-AT-DH-KR-T)</b> |
| <i>k</i> | ATEG_07066 | DUF341 Domain              |
| <i>l</i> | ATEG_07065 | <b>NRPS (A)</b>            |
| <i>m</i> | ATEG_07064 | Integral Membrane Protein  |
| <i>n</i> | ATEG_07063 | Nitrite Reductase          |
| <i>o</i> | ATEG_07062 | Alcohol Dehydrogenase      |

E) FAC: AtFAC5N15 (101 kb)

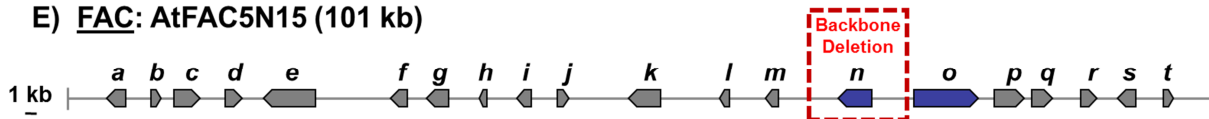

**Metabolite: facms0008 (277 Da)**

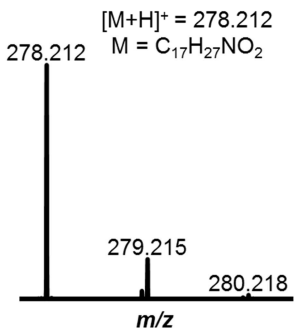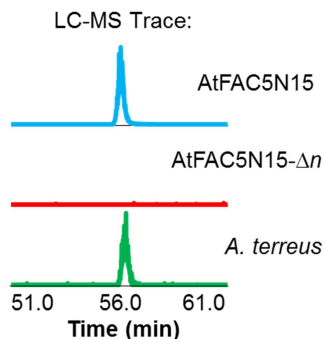

| ORF | Gene ID    | Predicted Function        |
|-----|------------|---------------------------|
| a   | ATEG_07393 | Aldehyde Dehydrogenase    |
| b   | ATEG_07392 | Short Chain Dehydrogenase |
| c   | ATEG_07391 | Transcription Factor      |
| d   | ATEG_07390 | FAD-Binding Domain        |
| e   | ATEG_07389 | C6 Finger Domain          |
| f   | ATEG_07388 | Alkaline Peptidase        |
| g   | ATEG_07387 | Beta-Lactamase            |
| h   | ATEG_07386 | Resistance Protein        |
| i   | ATEG_07385 | Aldo-Keto Reductase       |
| j   | ATEG_07384 | Alpha/Beta Hydrolase      |
| k   | ATEG_07383 | Beta-Xylosidase           |
| l   | ATEG_07382 | Short Chain Dehydrogenase |
| m   | ATEG_07381 | Alpha/Beta Hydrolase      |
| n   | ATEG_07380 | <b>NRPS-Like (A-T-R)</b>  |
| o   | ATEG_07379 | <b>PKS (KS-AT-DH-T-T)</b> |
| p   | ATEG_07378 | FAD-Binding Domain        |
| q   | ATEG_07377 | O-Methyltransferase       |
| r   | ATEG_07376 | Myb-Like DNA-Binding      |
| s   | ATEG_07375 | MFS Transporter           |
| t   | ATEG_07374 | 3-Oxo-Acyl-ACP Reductase  |

F) FAC: AtFAC7O19 (28 kb)

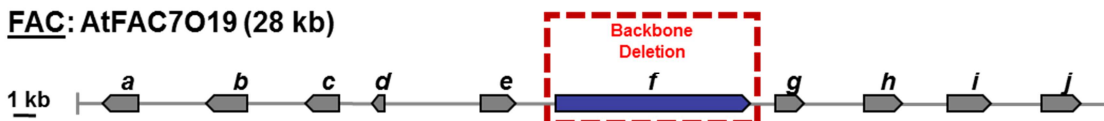

**Metabolite: facms0016 (309 Da)**

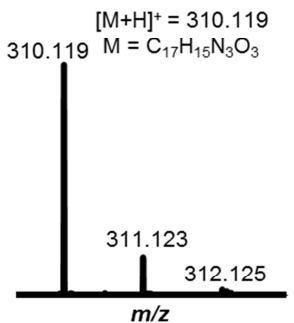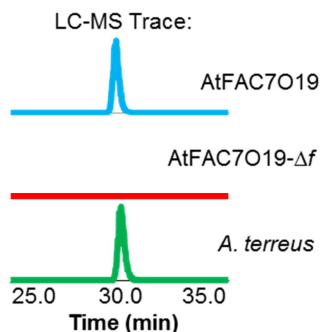

| ORF | Gene ID    | Predicted Function          |
|-----|------------|-----------------------------|
| a   | ATEG_07363 | MFS Transporter             |
| b   | ATEG_07362 | Cytochrome P450             |
| c   | ATEG_07361 | Integral Membrane Protein   |
| d   | ATEG_07360 | Thaumatococcus Domain       |
| e   | ATEG_07359 | Indoleamine 2,3-Dioxygenase |
| f   | ATEG_07358 | <b>NRPS (A-T-C-A-T-C-T)</b> |
| g   | ATEG_07357 | Transcription Factor        |
| h   | ATEG_07356 | Glycoside Hydrolase         |
| i   | ATEG_07355 | Sugar Transporter           |
| j   | ATEG_07354 | Zinc Dehydrogenase          |

G) **FAC: AaFAC6A16 (93 kb)**

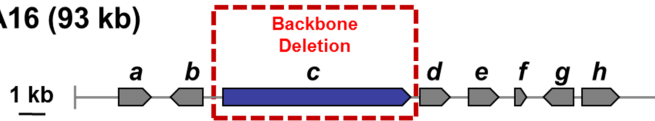

**Metabolite: facms0001 (402 Da)**

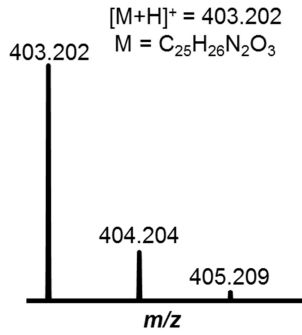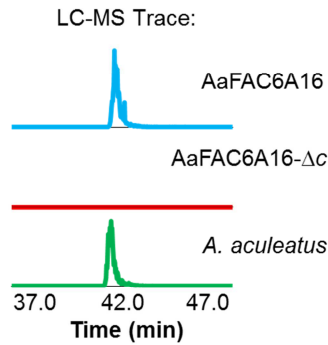

| ORF | Gene ID    | Predicted Function        |
|-----|------------|---------------------------|
| a   | AACU_46597 | Tryptophan DMAT           |
| b   | AACU_46596 | Aldehyde Reductase        |
| c   | AACU_46595 | <b>NRPS (A-T-C-A-T-C)</b> |
| d   | AACU_34424 | Alcohol Dehydrogenase     |
| e   | AACU_63363 | Integral Membrane Protein |
| f   | AACU_46592 | Hypothetical Protein      |
| g   | AACU_46591 | Arrestin-Like             |
| h   | AACU_46590 | C6 Transcription Factor   |

H) **FAC: AaFAC10D7 (122 kb)**

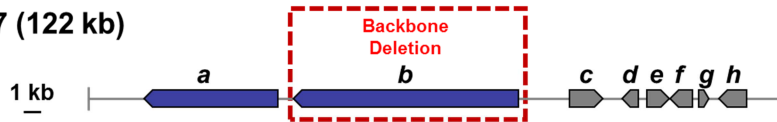

**Metabolite: facms0003 (273 Da)**

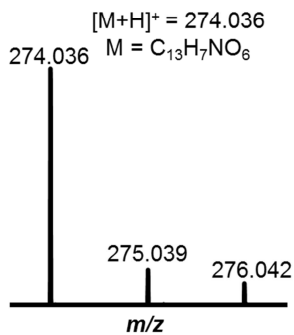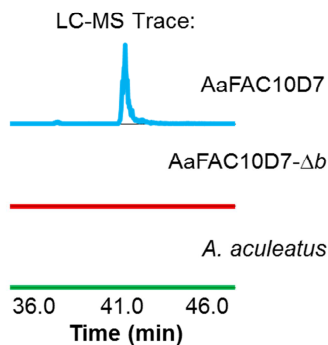

| ORF | Gene ID    | Predicted Function                       |
|-----|------------|------------------------------------------|
| a   | AACU_26431 | <b>PKS (KS-AT-DH-MT-ER-KR-T)</b>         |
| b   | AACU_51108 | <b>NRPS/PKS (KS-AT-DH-MT-KR-C-A-T-R)</b> |
| c   | AACU_51107 | Cytochrome P450                          |
| d   | AACU_08044 | Hypothetical Protein                     |
| e   | AACU_41415 | Alcohol Dehydrogenase                    |
| f   | AACU_26007 | Alpha/Beta-Hydrolase                     |
| g   | AACU_58887 | Hypothetical Protein                     |
| h   | AACU_26403 | Cytochrome P450                          |

I) **FAC: AaFAC2P8 (141 kb)**

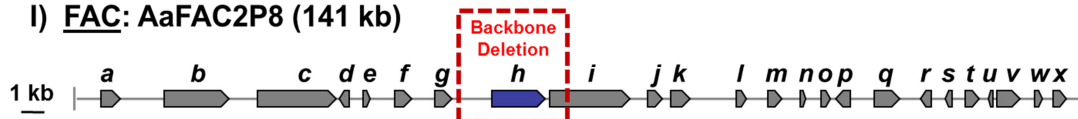

**Metabolite: facms0002 (558 Da)**

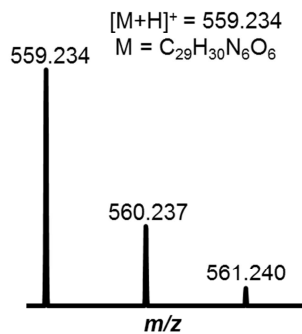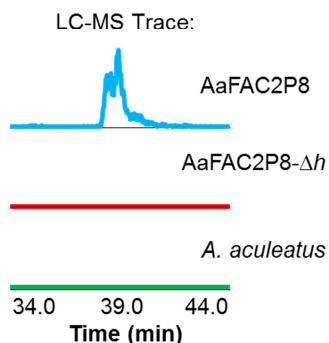

| ORF | Gene ID    | Predicted Function          |
|-----|------------|-----------------------------|
| a   | AACU_58519 | ToxD-Like Oxidoreductase    |
| b   | AACU_25249 | WD40 Repeat-Like            |
| c   | AACU_50845 | Tetratricopeptide-Like      |
| d   | AACU_40975 | Hypothetical Protein        |
| e   | AACU_40974 | Cytochrome P450             |
| f   | AACU_40973 | Formate/Nitrite Transporter |
| g   | AACU_40972 | Hypothetical Protein        |
| h   | AACU_59515 | <b>NRPS-like (A-T-R)</b>    |
| i   | AACU_50843 | ABC Transporter             |
| j   | AACU_40969 | Zinc Finger Protein         |
| k   | AACU_25059 | Aorisin Protease            |
| l   | AACU_40967 | Acyl-CoA N-Acyltransferase  |
| m   | AACU_58511 | Extracellular Dioxygenase   |
| n   | AACU_40965 | GNAT N-Acetyltransferase    |
| o   | AACU_40964 | Short Chain Dehydrogenase   |
| p   | AACU_40963 | Beta-Lactamase              |
| q   | AACU_40962 | C2H2 Transcription Factor   |
| r   | AACU_40961 | Cytochrome P450             |
| s   | AACU_40960 | Alpha/Beta-Hydrolase        |
| t   | AACU_40959 | FAD Monooxygenase           |
| u   | AACU_40958 | Hypothetical Protein        |
| v   | AACU_40957 | C6 Transcription Factor     |
| w   | AACU_50839 | 14-Alpha Sterol Demethylase |
| x   | AACU_58505 | Cinnamoyl-CoA Reductase     |

J) **FAC: AwFAC1K8 (114 kb)**

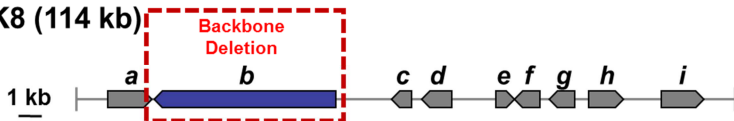

**Metabolite: facms0010 (987 Da)**

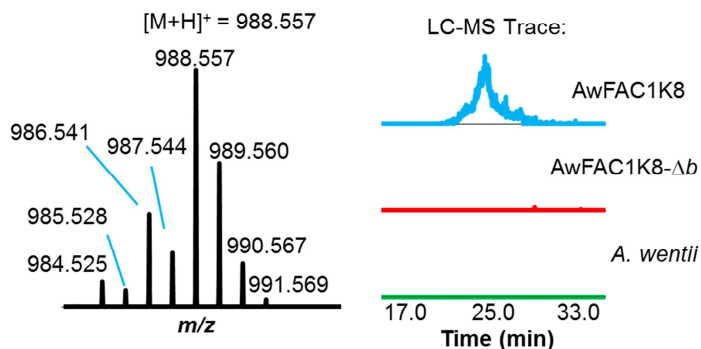

| ORF | Gene ID      | Predicted Function               |
|-----|--------------|----------------------------------|
| a   | ASPWE_182850 | Acetyltransferase                |
| b   | ASPWE_027400 | <b>PKS (KS-AT-DH-MT-ER-KR-T)</b> |
| c   | ASPWE_110131 | NADP Oxidoreductase              |
| d   | ASPWE_027397 | Lipase                           |
| e   | ASPWE_182848 | NAD Oxidoreductase               |
| f   | ASPWE_027395 | Inositol Dehydrogenase           |
| g   | ASPWE_112338 | ArcA-Like Protein                |
| h   | ASPWE_112121 | MFS Transporter                  |
| i   | ASPWE_154084 | Sugar Transporter                |

K) **FAC: AwFAC4E11 (105 kb)**

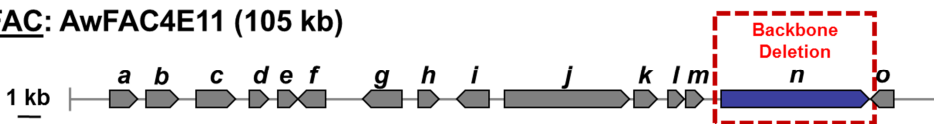

**Metabolite: facms0012 (576 Da)**

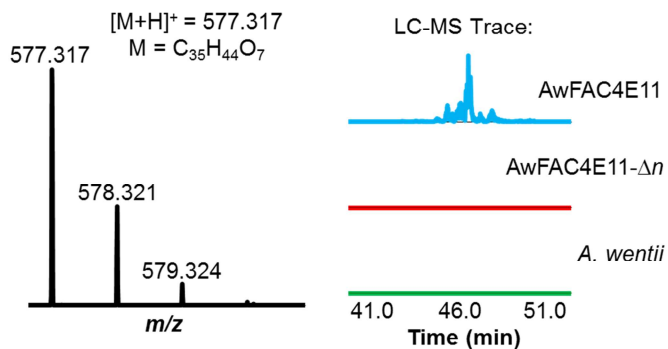

| ORF | Gene ID      | Predicted Function           |
|-----|--------------|------------------------------|
| a   | ASPWE_022952 | C6 Transcription Factor      |
| b   | ASPWE_022951 | Enoyl-CoA Hydratase          |
| c   | ASPWE_034287 | O-Methyltransferase          |
| d   | ASPWE_034285 | Hydrophobin                  |
| e   | ASPWE_064169 | Lysophospholipase-Like       |
| f   | ASPWE_034283 | Acetyltransferase            |
| g   | ASPWE_178631 | ZIP Zinc Transporter         |
| h   | ASPWE_166859 | Major Allergen               |
| i   | ASPWE_056119 | Short Chain Dehydrogenase    |
| j   | ASPWE_099620 | Transcription Factor         |
| k   | ASPWE_166855 | Gluconolactonase             |
| l   | ASPWE_034275 | Monooxygenase                |
| m   | ASPWE_233835 | Methyltransferase            |
| n   | ASPWE_034272 | <b>PKS (AT-KS-AT-DH-T-T)</b> |
| o   | ASPWE_102062 | Beta-Lactamase               |



## L) FAC: AwFAC4D17 (96 kb)

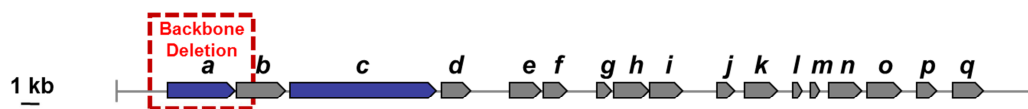

### Metabolite: facms0015 (541 Da)

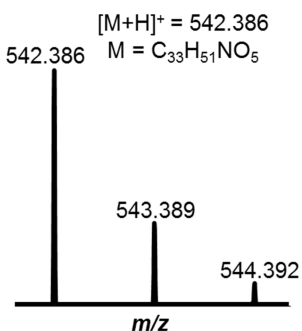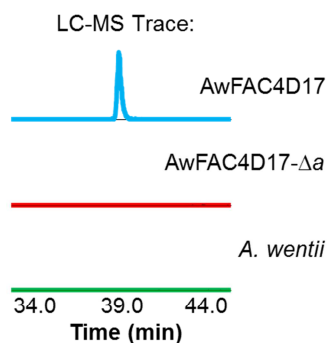

| ORF      | Gene ID      | Predicted Function            |
|----------|--------------|-------------------------------|
| <i>a</i> | ASPWE_042597 | <b>NRPS-like (A-T-R)</b>      |
| <i>b</i> | ASPWE_042596 | MFS Transporter               |
| <i>c</i> | ASPWE_042595 | <b>PKS (KS-AT-DH-MT-KR-T)</b> |
| <i>d</i> | ASPWE_052779 | Cytochrome P450               |
| <i>e</i> | ASPWE_586808 | Zinc Dehydrogenase            |
| <i>f</i> | ASPWE_743260 | Cytochrome P450               |
| <i>g</i> | ASPWE_113704 | Oxidoreductase                |
| <i>h</i> | ASPWE_042592 | C6 Transcription Factor       |
| <i>i</i> | ASPWE_042591 | Glycosyltransferase           |
| <i>j</i> | ASPWE_042589 | Transcription Factor          |
| <i>k</i> | ASPWE_112861 | MFS Transporter               |
| <i>l</i> | ASPWE_185079 | Ankyrin                       |
| <i>m</i> | ASPWE_042586 | Zinc Finger, C2H2-Like        |
| <i>n</i> | ASPWE_070267 | Dethiobiotin Synthase         |
| <i>o</i> | ASPWE_060925 | MFS Transporter               |
| <i>p</i> | ASPWE_136814 | Dioxygenase                   |
| <i>q</i> | ASPWE_052774 | MFS Transporter               |

M) **FAC: AwFAC4D8 (80 kb)**

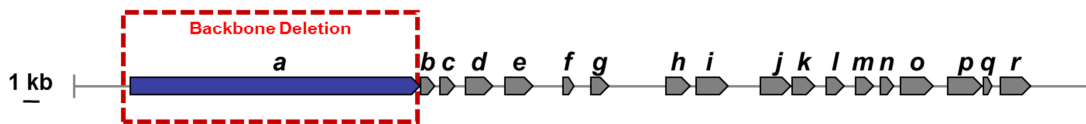

**Metabolite: facms0011 (679 Da)**

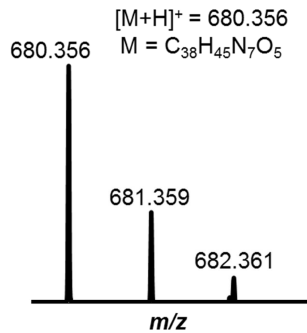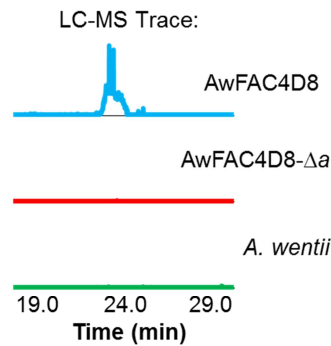

| ORF | Gene ID      | Predicted Function                        |
|-----|--------------|-------------------------------------------|
| a   | ASPWE_044725 | <b>NRPS (A-T-T-C-A-T-E-C-A-T-C-A-T-C)</b> |
| b   | ASPWE_670242 | N-Methyltransferase                       |
| c   | ASPWE_031465 | N-Acetyltransferase                       |
| d   | ASPWE_044723 | Hypothetical Protein                      |
| e   | ASPWE_118134 | MFS Transporter                           |
| f   | ASPWE_116569 | Hypothetical Protein                      |
| g   | ASPWE_670176 | C6 Transcription Factor                   |
| h   | ASPWE_044719 | C6 Transcription Factor                   |
| i   | ASPWE_162202 | MFS Transporter                           |
| j   | ASPWE_162198 | Cytochrome P450                           |
| k   | ASPWE_186729 | Terpene Synthase                          |
| l   | ASPWE_031457 | Enoyl Reductase                           |
| m   | ASPWE_175848 | Arabinitol Dehydrogenase                  |
| n   | ASPWE_062177 | Short Chain Dehydrogenase                 |
| o   | ASPWE_175846 | C6 Transcription Factor                   |
| p   | ASPWE_175845 | Hypothetical Function                     |
| q   | ASPWE_175844 | Glutamine Amidotransferase                |
| r   | ASPWE_162187 | MFS Transporter                           |

N) **FAC: AwFAC1H17 (87 kb)**

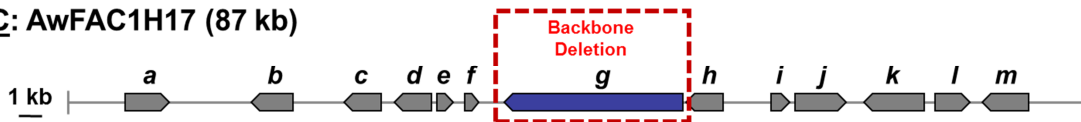

**Metabolite: facms0009 (422 Da)**

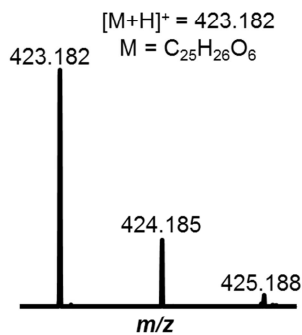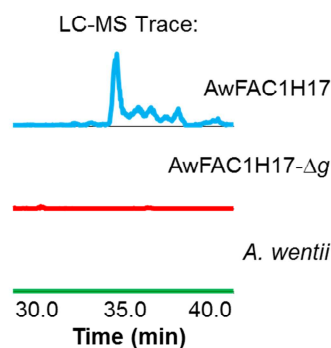

| ORF | Gene ID      | Predicted Function          |
|-----|--------------|-----------------------------|
| a   | ASPWE_182811 | FAD Monooxygenase           |
| b   | ASPWE_110653 | Glucose Oxidase             |
| c   | ASPWE_110954 | Alpha/Beta Hydrolase        |
| d   | ASPWE_050976 | Metalloprotease             |
| e   | ASPWE_109715 | Ankyrin                     |
| f   | ASPWE_096725 | Ankyrin                     |
| g   | ASPWE_085322 | <b>NRPS (C-A-T-C-A-T-C)</b> |
| h   | ASPWE_739335 | Aminotransferase            |
| i   | ASPWE_171489 | C6 Transcription Factor     |
| j   | ASPWE_068122 | Oxidase                     |
| k   | ASPWE_027350 | Hypothetical Protein        |
| l   | ASPWE_171486 | Hemeolysin E                |
| m   | ASPWE_132289 | MFS Transporter             |

O) **FAC: AtFAC5L7 (124 kb)**

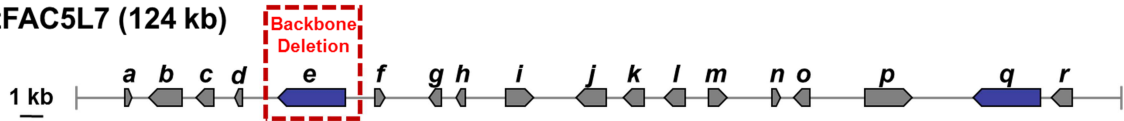

**Metabolite: facms0006 (673 Da)**

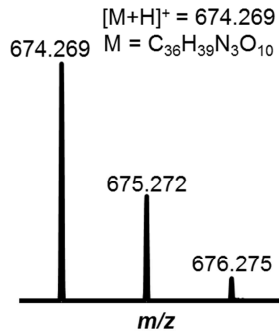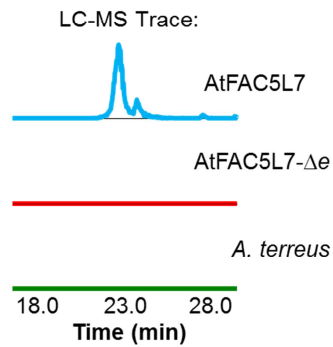

| ORF | Gene ID    | Predicted Function           |
|-----|------------|------------------------------|
| a   | ATEG_07504 | Transporter                  |
| b   | ATEG_07503 | N,N-Dimethylglycine Oxidase  |
| c   | ATEG_07502 | Monoxygenase                 |
| d   | ATEG_07501 | O-Methyltransferase          |
| e   | ATEG_07500 | <b>PKS (KS-AT-DH-T-T-TE)</b> |
| f   | ATEG_07499 | C6 Transcription Factor      |
| g   | ATEG_07498 | Dioxygenase                  |
| h   | ATEG_07497 | Chitin Binding Domain        |
| i   | ATEG_07496 | C6 Zinc Finger Domain        |
| j   | ATEG_07495 | Hypothetical Protein         |
| k   | ATEG_07494 | Transporter                  |
| l   | ATEG_07493 | Exoglucanase                 |
| m   | ATEG_07492 | Arylsulfotransferase Domain  |
| n   | ATEG_07491 | N-Acetyltransferase          |
| o   | ATEG_07490 | Oxidoreductase               |
| p   | ATEG_07489 | ABC Transporter              |
| q   | ATEG_07488 | <b>NRPS (A-T-C-T-C)</b>      |
| r   | ATEG_07487 | Iron Transporter             |

P) **FAC: AwFAC3D3 (109 kb)**

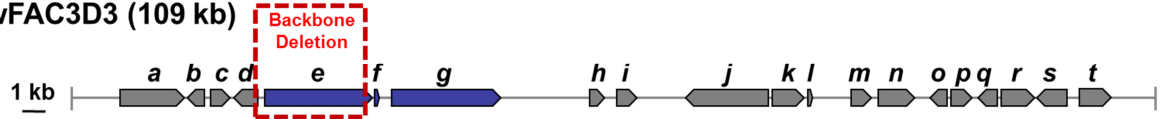

**Metabolite: facms0014 (735 Da)**

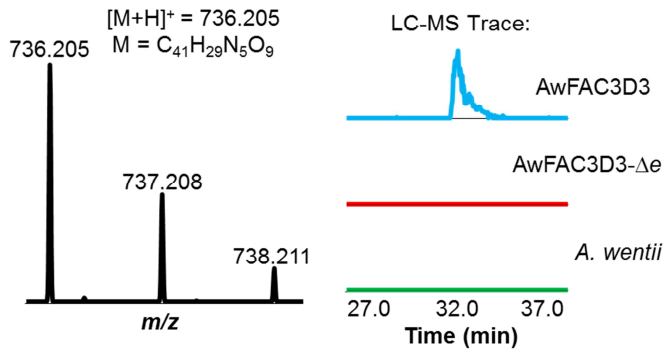

| ORF | Gene ID      | Predicted Function                |
|-----|--------------|-----------------------------------|
| a   | ASPWE_169905 | ABC Transporter                   |
| b   | ASPWE_169904 | Histidine Kinase                  |
| c   | ASPWE_405376 | Pyrroline-5-Carboxylate Reductase |
| d   | ASPWE_037945 | Protein Kinase                    |
| e   | ASPWE_151732 | <b>NRPS (A-T-C)</b>               |
| f   | ASPWE_080973 | <b>NRPS (A)</b>                   |
| g   | ASPWE_151729 | <b>NRPS (A-T-E-C-A-T-TE)</b>      |
| h   | ASPWE_169900 | Chitinase                         |
| i   | ASPWE_025854 | Hypothetical Protein              |
| j   | ASPWE_108842 | Chitin-Binding                    |
| k   | ASPWE_737166 | Chitin-Binding                    |
| l   | ASPWE_107897 | Chitin-Binding                    |
| m   | ASPWE_037942 | Hypothetical Protein              |
| n   | ASPWE_169895 | Transcription Factor              |
| o   | ASPWE_049886 | Glycoside Hydrolase               |
| p   | ASPWE_037937 | Glycoside Hydrolase               |
| q   | ASPWE_058281 | Fructose-Bisphosphate Aldolase    |
| r   | ASPWE_107812 | Transcription Factor              |
| s   | ASPWE_151707 | MFS Transporter                   |
| t   | ASPWE_049881 | NADP Dehydrogenase                |

Q) **FAC: AwFAC1B1 (90 kb)**

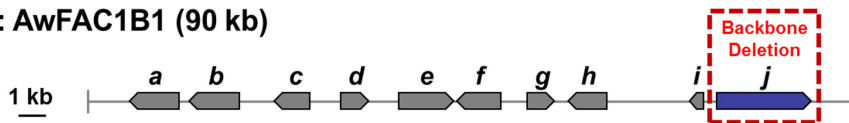

**Metabolite: facms0013 (471 Da)**

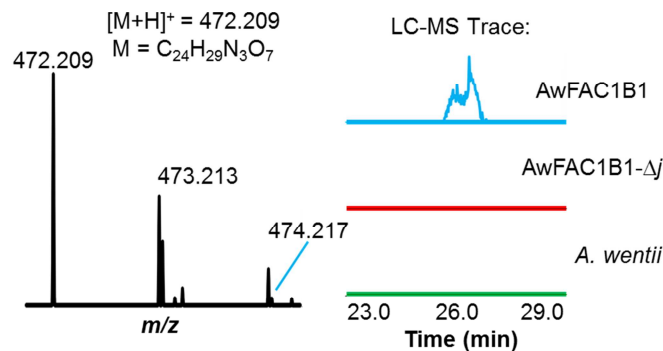

| ORF | Gene ID      | Predicted Function                 |
|-----|--------------|------------------------------------|
| a   | ASPWE_163811 | FAD Oxidase                        |
| b   | ASPWE_698138 | Integral Membrane Protein          |
| c   | ASPWE_045595 | Hypothetical Protein               |
| d   | ASPWE_163803 | 2-Hydroxyisobutyrate Dehydrogenase |
| e   | ASPWE_747605 | Transcription Factor               |
| f   | ASPWE_119056 | MFS Transporter                    |
| g   | ASPWE_045592 | Beta-Galactosidase                 |
| h   | ASPWE_054731 | O-Methyltransferase                |
| i   | ASPWE_045587 | Hypothetical Protein               |
| j   | ASPWE_163793 | <b>NRPS-Like (A-T-R)</b>           |

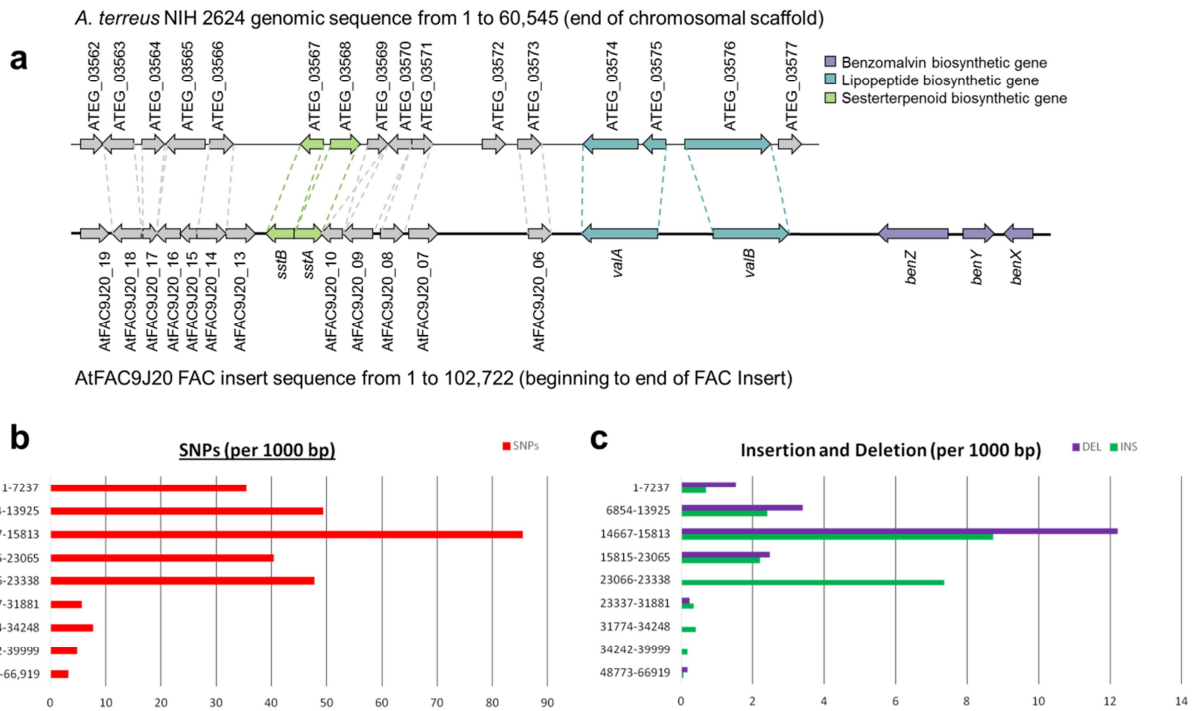

**Supplementary Figure 3. Alignment of the sequenced AtFAC9J20 insert with *A. terreus* strain NIH 2624 reference genome. (a)** linear alignment of *A. terreus* strain NIH 2624 reference sequence (top) and the sequence of AtFAC9J20 derived from *A. terreus* strain ATCC 20542 (bottom). AtFAC9J20 BGCs for the sesterterpenoid (green), valactamide (teal), and benzomalvin (purple) are shown; the middle panel of **a** shows sequence alignment with large deletions, insertions, inversions and conserved sequences. **(b)** SNPs found in AtFAC9J20 insert relative to *A. terreus* strain NIH 2624. **(c)** Insertions and deletions found in AtFAC9J20 insert relative to *A. terreus* strain NIH 2624.

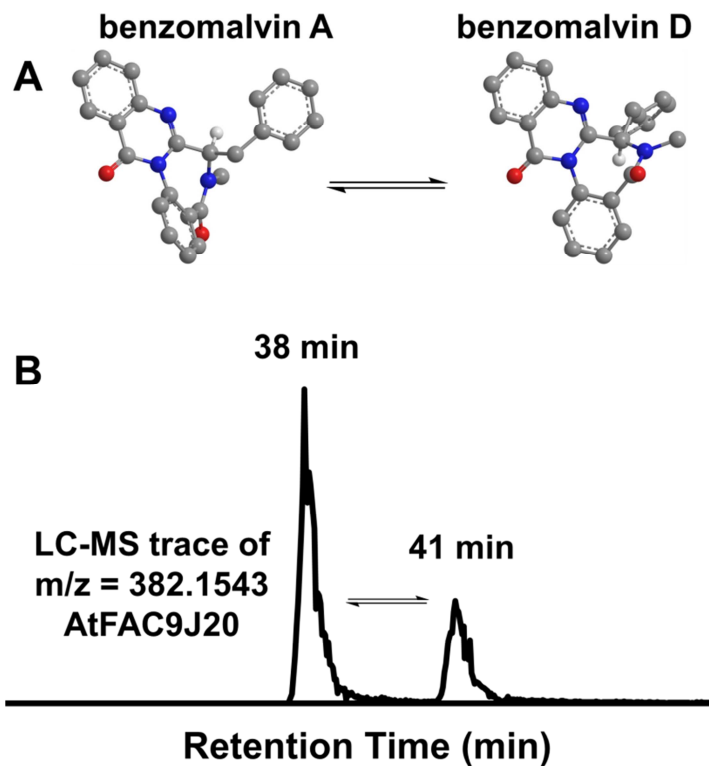

**Supplementary Figure 4. AtFAC9J20 produces atropisomeric pair benzomalvin A and benzomalvin D. (a)** Benzomalvin A is in equilibrium with its atropisomer, benzomalvin D. **(b)** Peaks corresponding to each atropisomer are shown a 38 and 41 minutes. Based on relative peak abundance, it is expected that benzomalvin A is the peak at 38 min and benzomalvin D at 41 min.

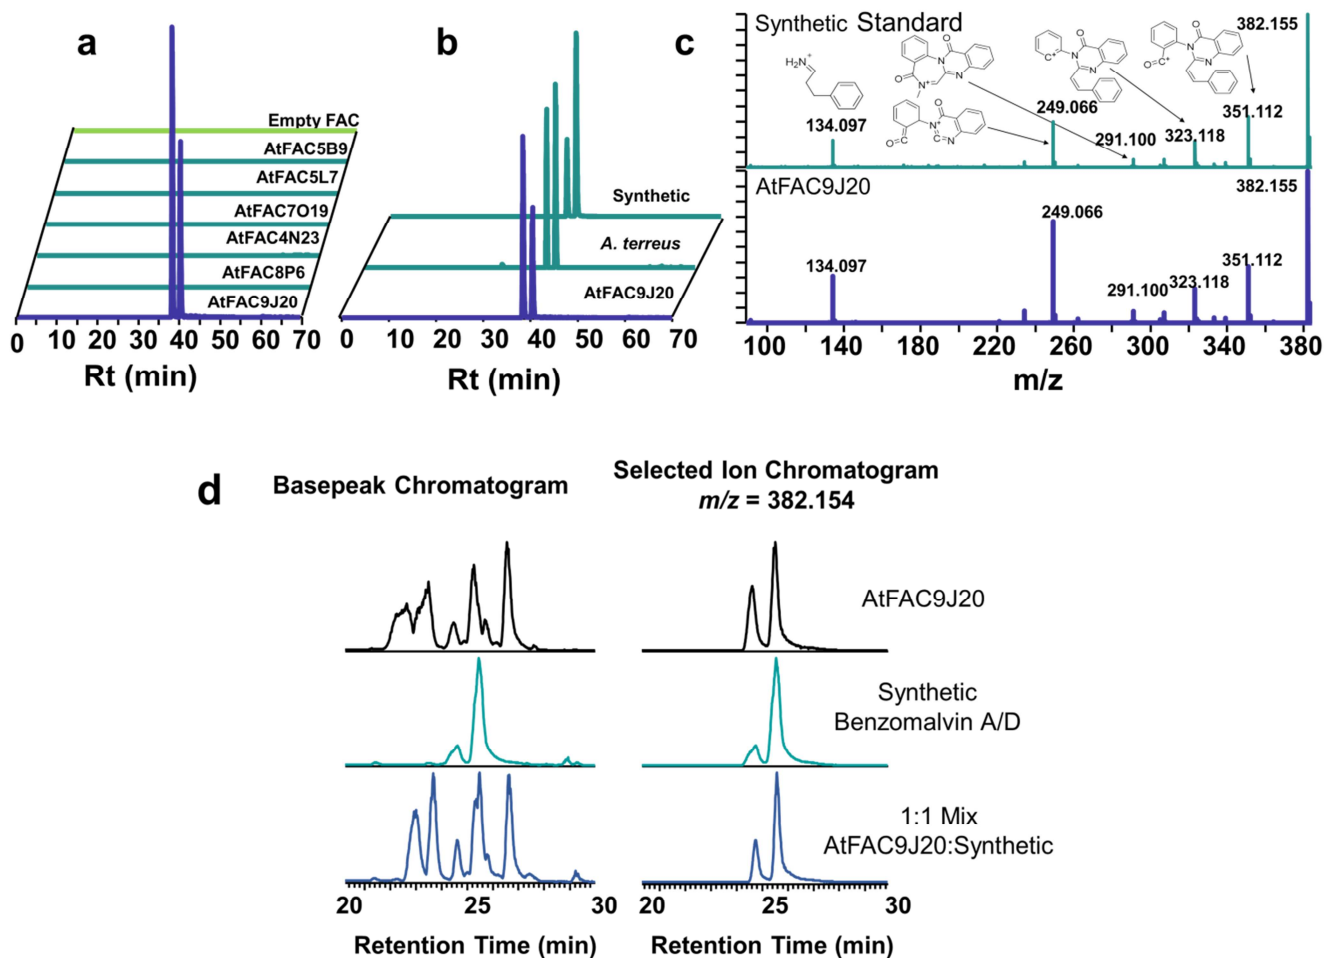

**Supplementary Figure 5. AtFAC9J20 encodes the BGC for benzomalvin A/D.** (a) Selected ion chromatograms of 382.1545  $\pm$  5 ppm reveal an unknown, highly abundant ion unique to extracts from a strain harboring FAC AtFAC9J20. (b) Benzomalvin A/D was synthesized and analyzed by LC-MS/MS. Retention time and  $m/z$  of the synthetic standard matches the ion detected at 382.1545, found in both AtFAC9J20 extract and extract from *A. terreus* ATCC 20524. (c) MS<sup>2</sup> of ion at  $m/z = 382.1545$  of the synthetic standard matches that of AtFAC9J20, confirming the identity of the unknown ion as benzomalvin A/D. (d) Comparison of benzomalvin from AtFAC9J20, from the synthetic standard, and coinjection of the two as a 1:1 mixture confirms their homogeneity.

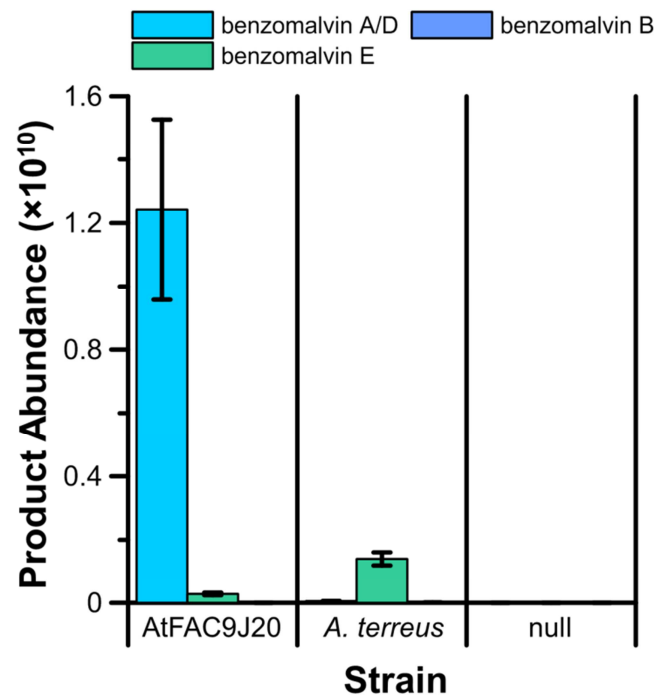

**Supplementary Figure 6. Abundance of benzomalvins in AtFAC9J20-transformed strain.** Amount of benzomalvin A/D, E, and B produced by AtFAC9J20, *A. terreus* strain ATCC 20524, and AtFAC9J20-null.



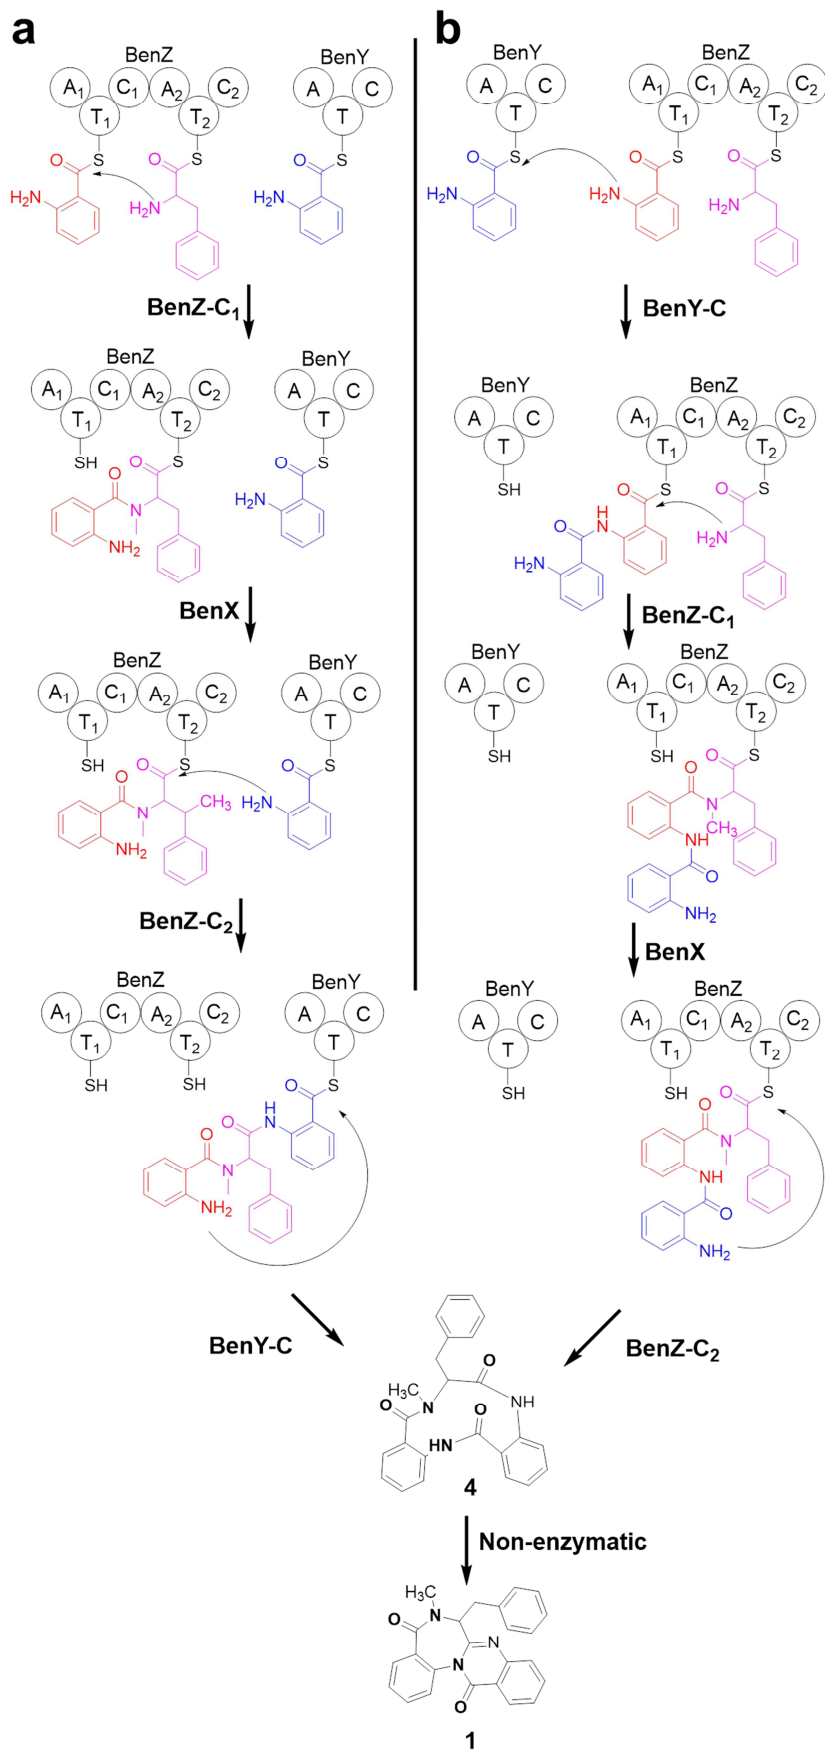

**Supplementary Figure 7. Possible models of benzomalvin biosynthesis.** Two potential models (**a** and **b**) of benzomalvin biosynthesis are shown, which fit the data presented in this study. **a)** The pathway begins with the loading of amino acid precursors onto the A domains of BenY and BenZ. BenY and the A<sub>1</sub> domain of BenZ are loaded with Anth, while the A<sub>2</sub> domain of BenZ is loaded with Phe. N-methylation of Phe by BenX may happen before loading of Phe onto BenZ, after loading of Phe, or after dipeptide formation. Condensation of Anth with the secondary amine of NmPhe or Phe is catalyzed by the C<sub>1</sub> domain of BenZ, forming a dipeptide intermediate, which is observed to accumulate in the *benY* deletant due to spontaneous hydrolysis. This is followed by *in trans* condensation of the Anth-NmPhe dipeptide with Anth bound to the T domain of BenY by the C<sub>2</sub> domain of BenZ to form the linear tripeptide Anth-NmPhe-Anth. Cyclization and release of the tripeptide is then catalyzed by the C<sub>T</sub> domain of BenY and the resulting 11-member macrocyclic intermediate is expected to spontaneously collapse to form the benzodiazepine core, as previously reported for the anthranilate containing tripeptide secondary metabolite scaffold, asperlicin<sup>15</sup>. Alternatively, the model represented in **b)** is also possible based on the current evidence, where the observed accumulation of the Anth-NmPhe dipeptide would be an off-pathway product resulting from the absence of BenY activity in the *benY* deletant. In this pathway, the linear tripeptide Anth-Anth-NmPhe is formed attached to BenZ-T<sub>2</sub> and BenZ-C<sub>2</sub> acts as the terminal, cyclizing C domain to release the macrocyclic tripeptide. Sequence alignment is not able to predict which of the two C domains act as the terminal cyclizing C-domain, and future studies will seek to investigate the roles of the C domains of BenZ and BenY in order to determine which biosynthetic pathway occurs.

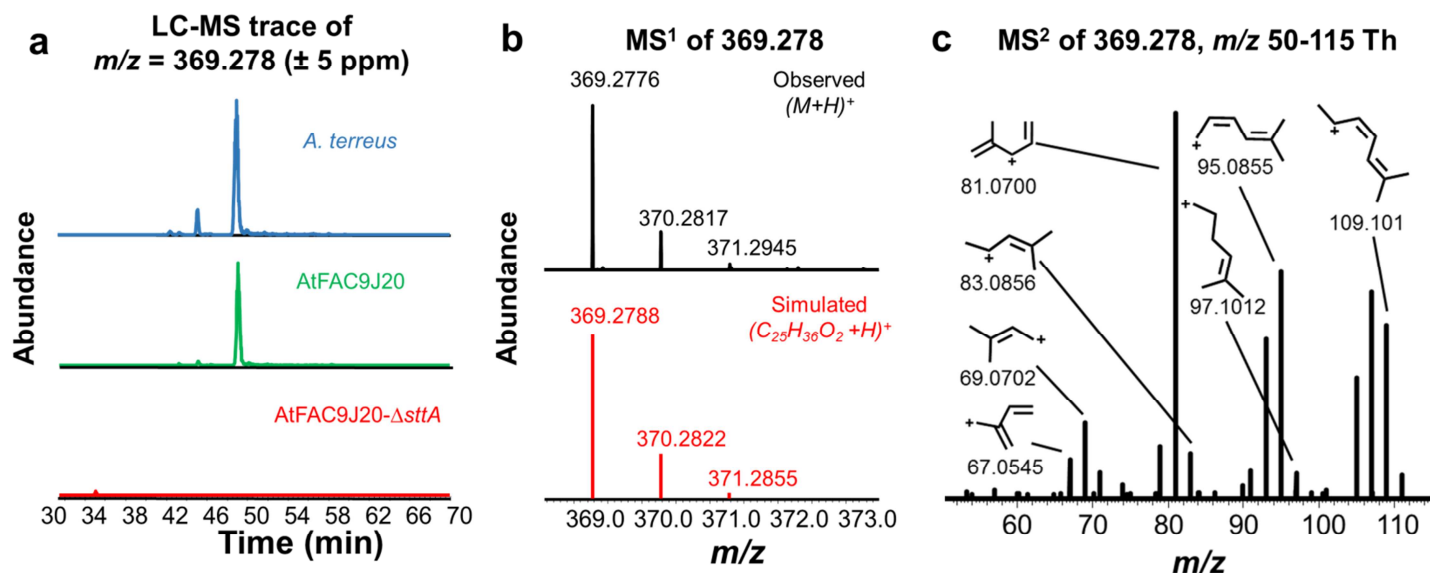

**Supplementary Figure 8. Detection of sesterterpenoid product.** (a) The ion with  $m/z = 369.2783$  is present in extracts of *A. terreus* strains ATCC 20524, AtFAC9J20, but not in the AtFAC9J20- $\Delta sttA$  deletant. (b) The simulated formula  $C_{25}H_{36}O_2$  matches the observed MS<sup>1</sup> spectrum within 3 ppm. (c) Analysis of the low-mass region ( $m/z$  50 to 115) of the MS<sup>2</sup> spectrum of parent ion 369.278 confirms terpenoid structure, with terpenoid diagnostic fragments shown.

### Fungal compounds matching: $C_{25}H_{36}O_2$ , 368.2715 Da

21-hydroxy-Ophiobolin G

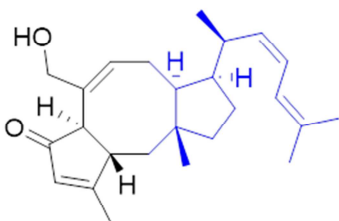

Ophiobolin V

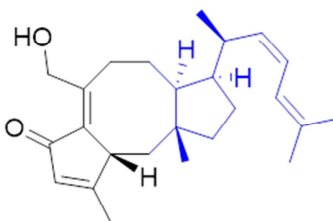

Variocolin

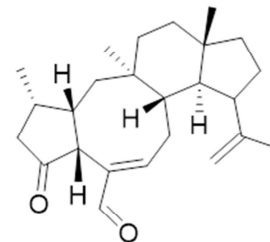

6-Epiophiobolin N

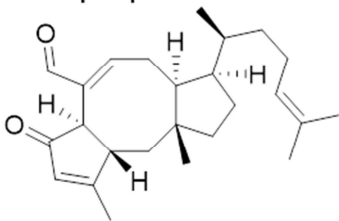

Ophiobolin U

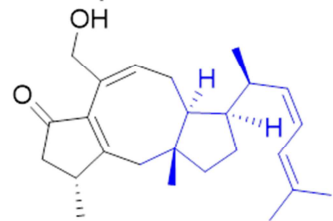

**Supplementary Figure 9. Structures of sesterterpenoids.** Structures of known fungal sesterterpenoids with the molecular formula of  $C_{25}H_{36}O_2$ , matching the unknown ion with  $m/z = 369.2710$ .

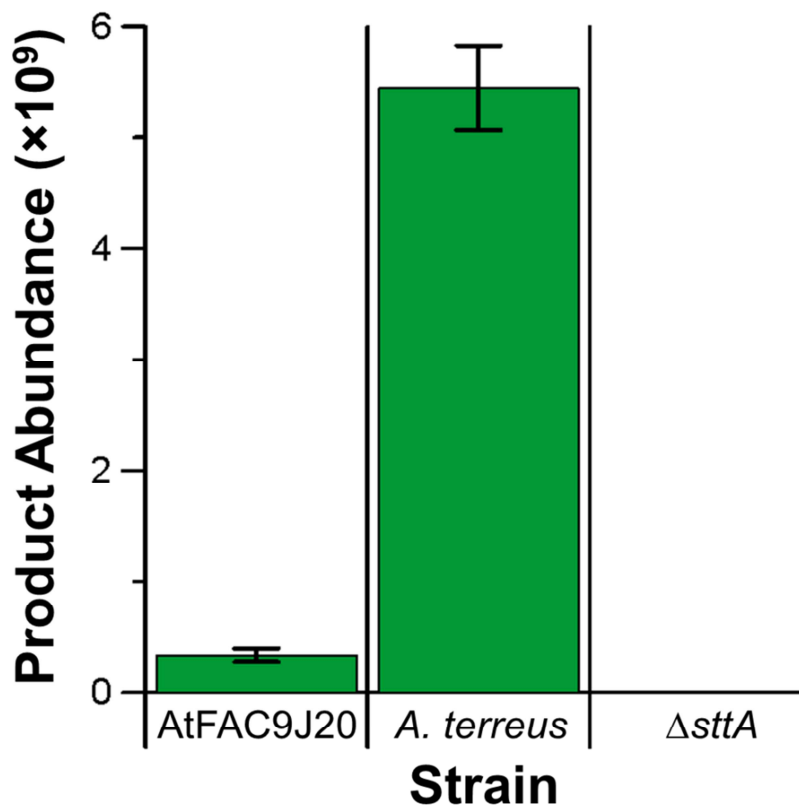

**Supplementary Figure 10. Sesterterpenoid production by AtFAC9J20, *A. terreus* ATCC 20524, and AtFAC9J20- $\Delta sttA$ .** The sesterterpenoid is produced by AtFAC9J20 at lower levels than by *A. terreus*. Deletant AtFAC9J20- $\Delta sttA$  eliminates production of the sesterterpenoid.

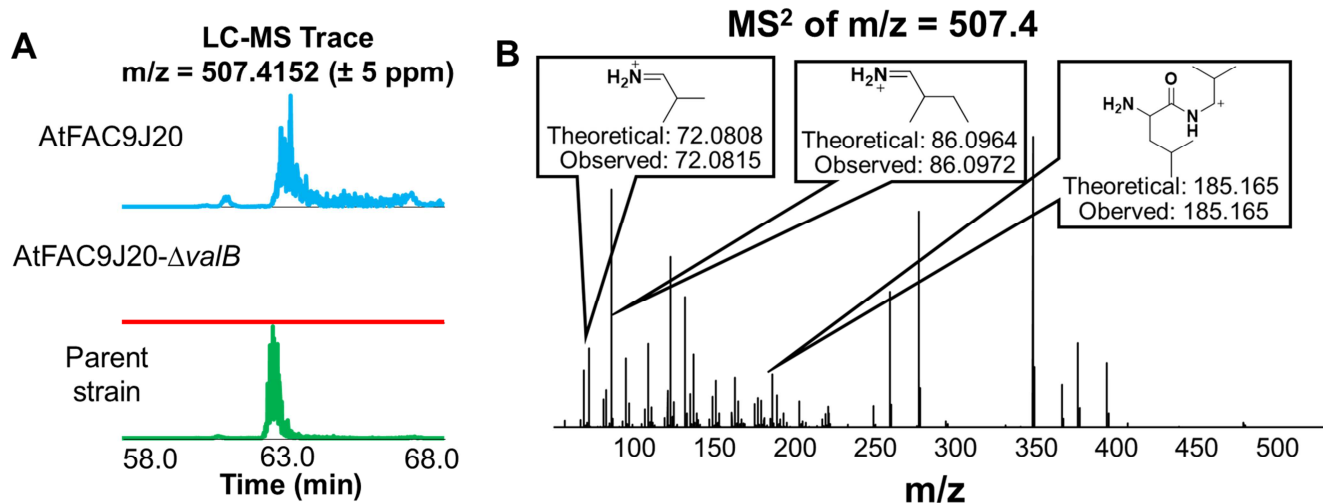

**Supplementary Figure 11. Valactamide A produced by AtFAC9J20.** (a) An ion with  $m/z = 507.4152$ , corresponding to the newly discovered metabolite valactamide A, was detected in extracts from AtFAC9J20 and *A. terreus* strain ATCC 20542, but not AtFAC9J20- $\Delta valB$ . (b) The  $MS^2$  spectrum reveals immonium ions consistent with Val (obs.  $m/z = 72.0815$ ) and either Ile or Leu residues (obs.  $m/z = 86.0972$ ). Also an ion characteristic of a dipeptide of Ile and/or Leu with Val was observed (obs.  $m/z = 185.165$ ).

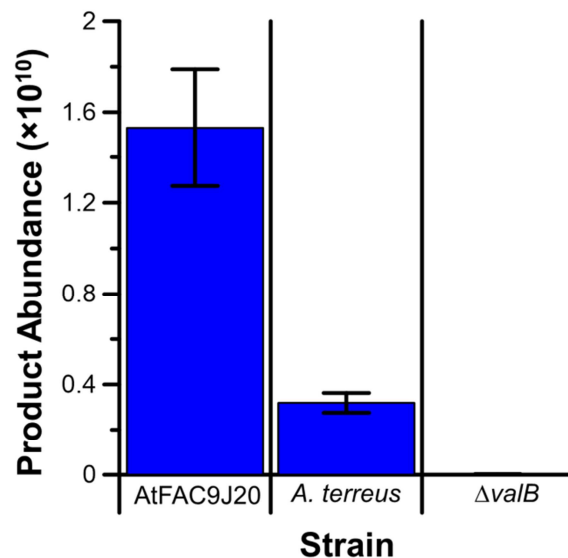

**Supplementary Figure 12. Valactamide A production by AtFAC9J20, *A. terreus* strain ATCC 20542, and AtFAC9J20- $\Delta valB$ .** Valactamide A production is increased in AtFAC9J20 relative to *A. terreus* and is abolished by the AtFAC9J20- $\Delta valB$  deletant.

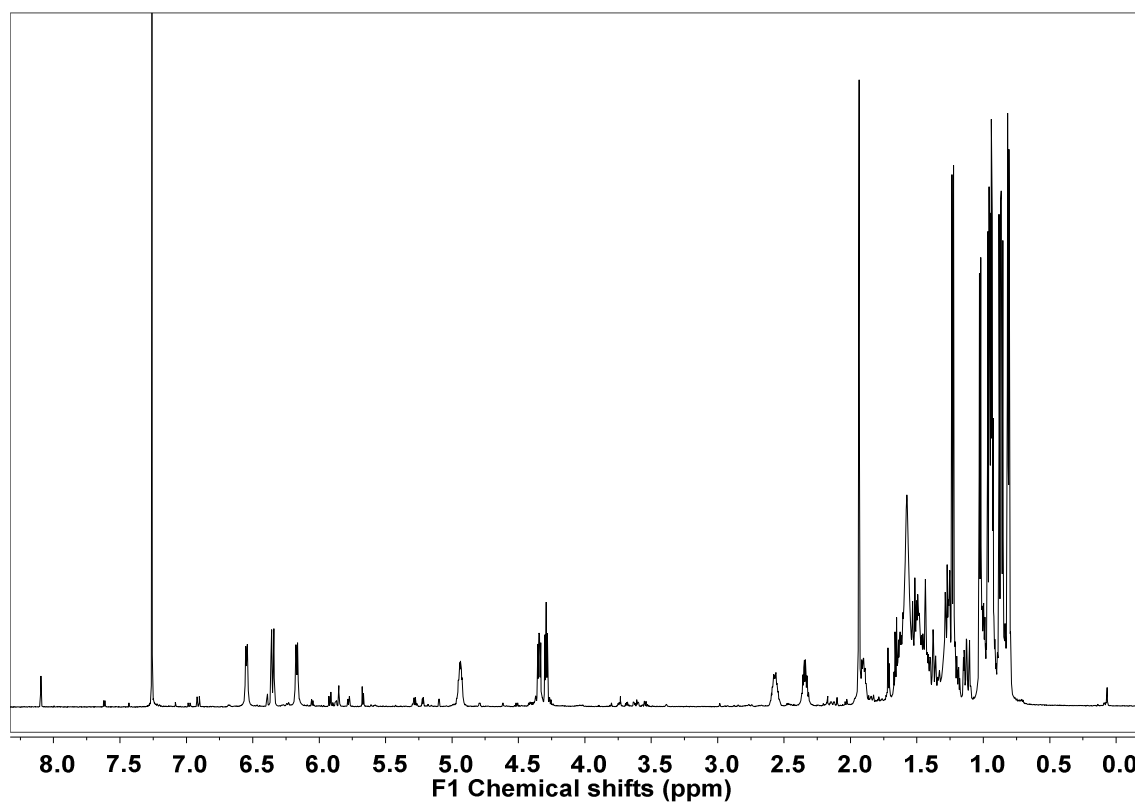

**Supplementary Figure 13.  $^1\text{H}$  NMR spectrum of valactamide A ( $\text{CDCl}_3$ , 600 MHz).**

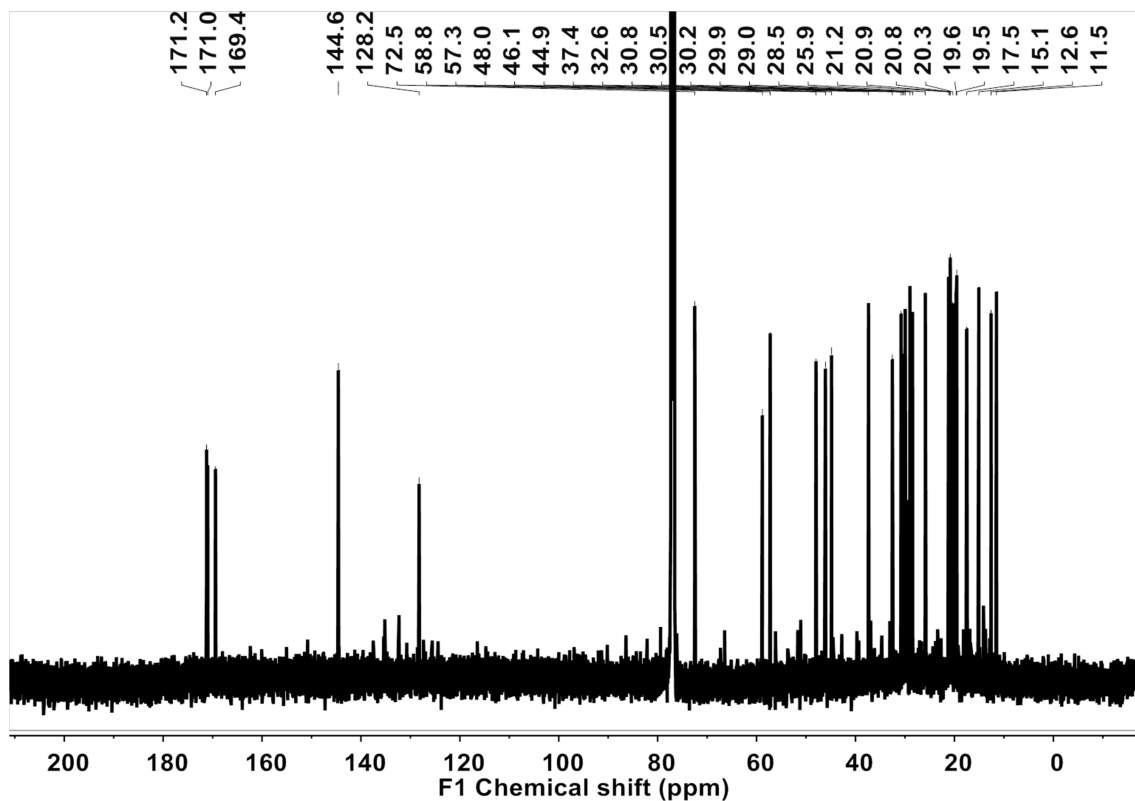

Supplementary Figure 14.  $^{13}\text{C}$  NMR spectrum of valactamide A ( $\text{CDCl}_3$ , 126 MHz).

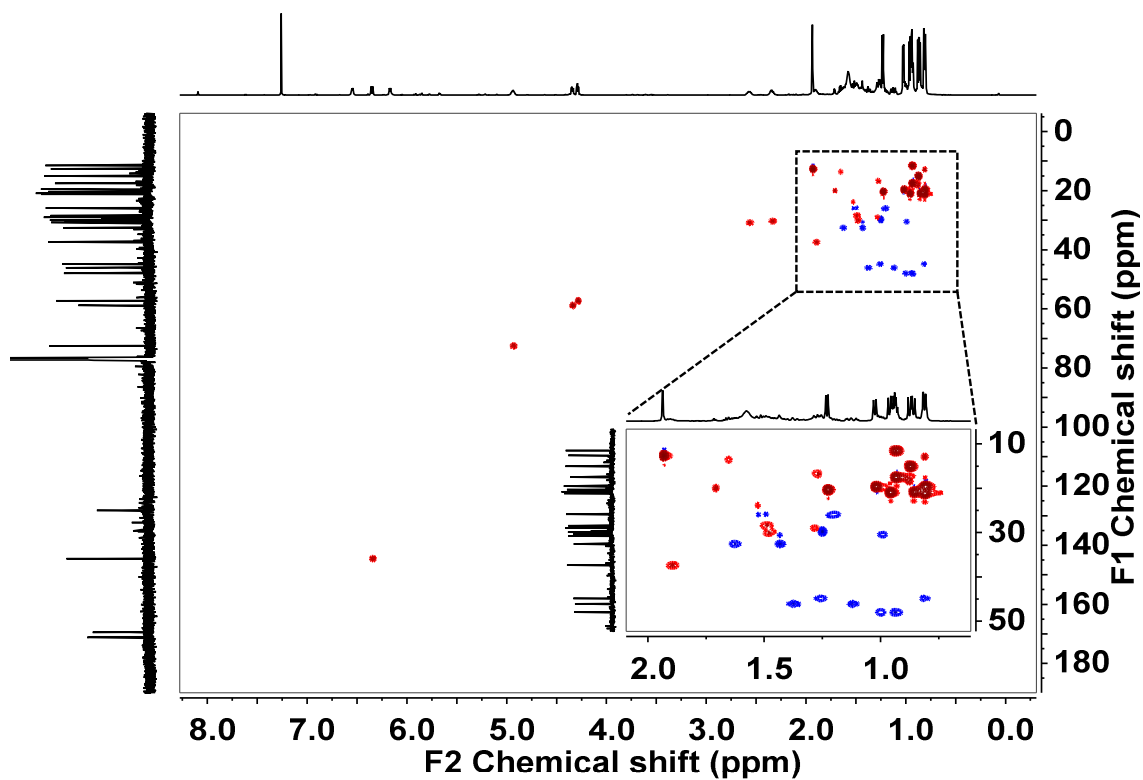

Supplementary Figure 15. HSQC spectrum of valactamide A ( $\text{CDCl}_3$ , 600 MHz).

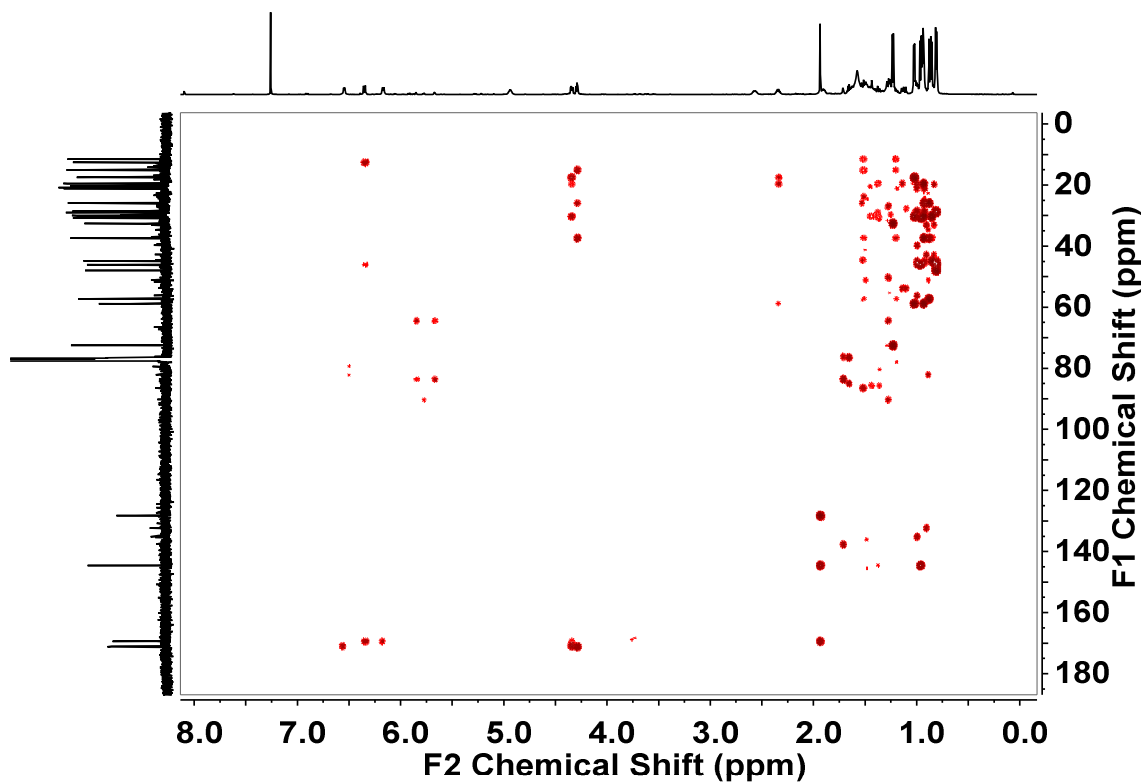

Supplementary Figure 16. HMBC spectrum of valactamide A ( $\text{CDCl}_3$ , 600 MHz).

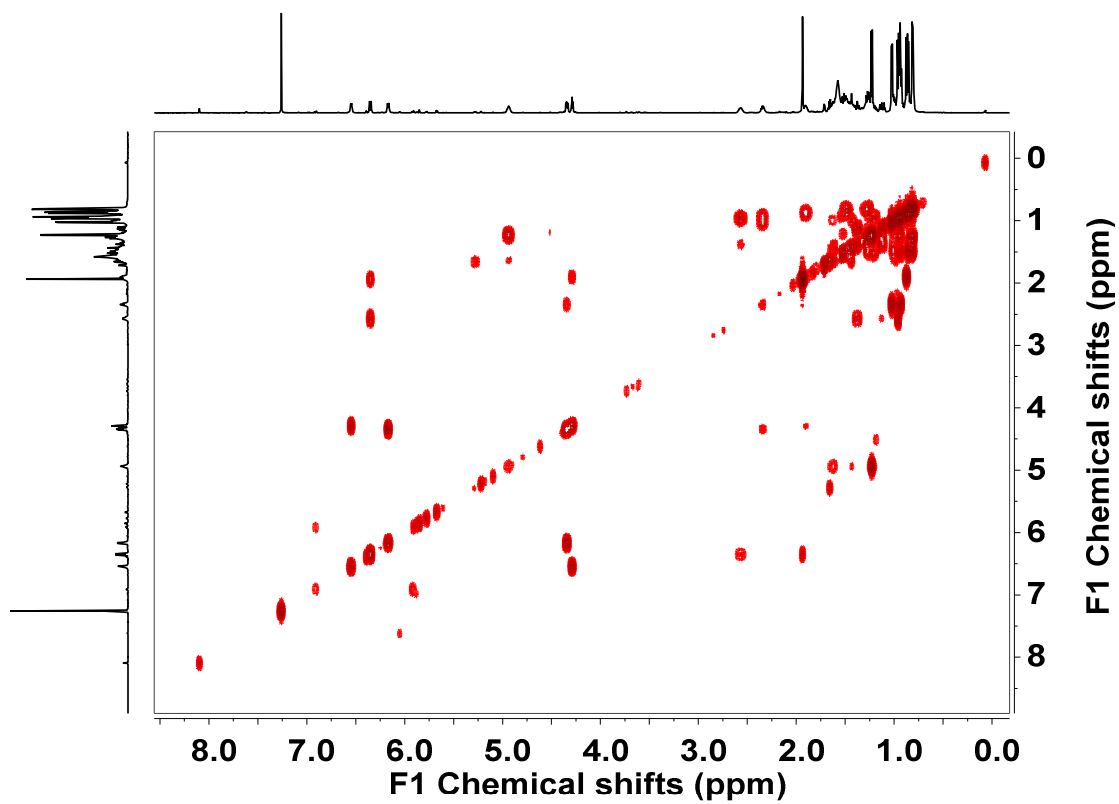

Supplementary Figure 17. gCOSY spectrum of valactamide A ( $\text{CDCl}_3$ , 600 MHz).



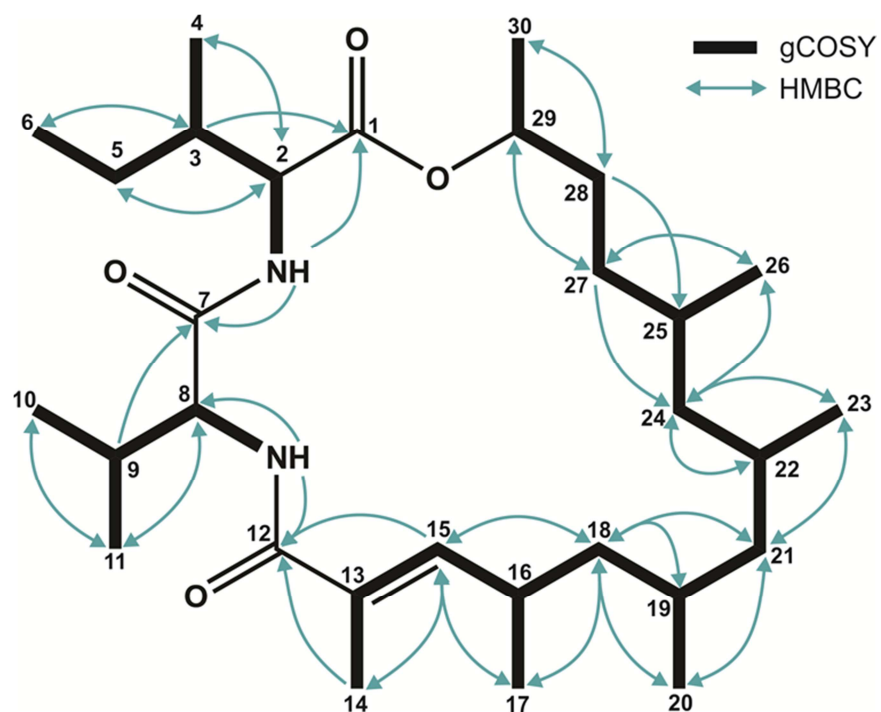

**Supplementary Figure 18. Main HMBC (blue) and gCOSY (bold bonds) correlations used for the structure elucidation of valactamide A.** COSY correlations are shown as thick lines and HMBC correlations are shown by blue arrows.

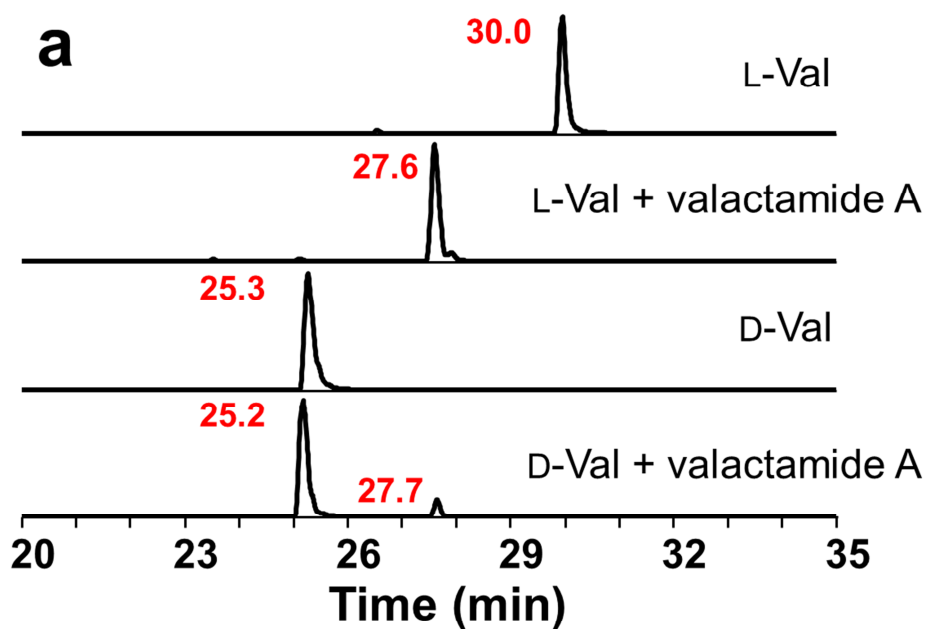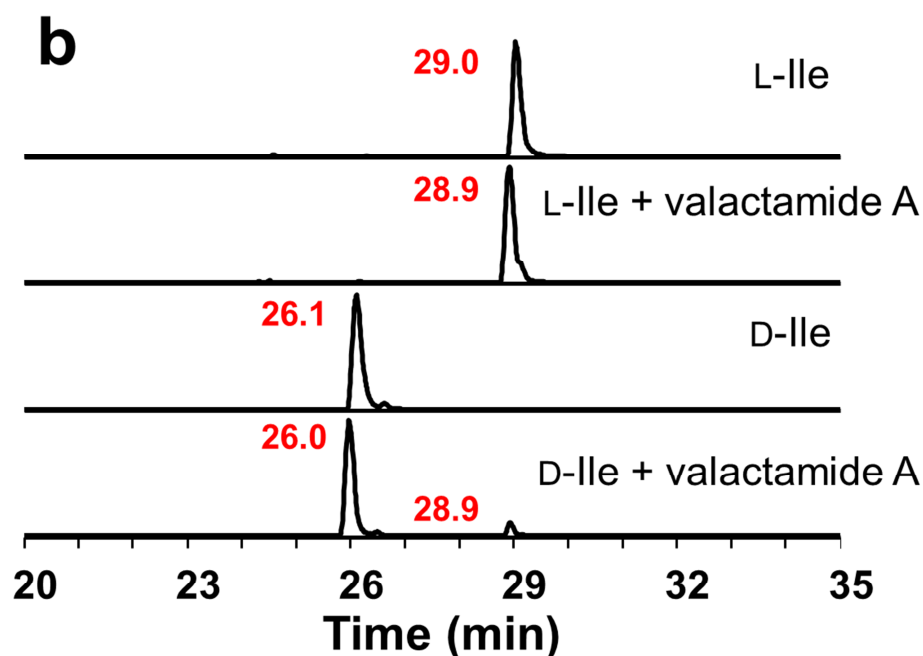

**Supplementary Figure 19. Valactamide A contains L-Val and L-Ile.** Marfey's reagent was used to derivatize free D and L amino acid standards and amino acids released by hydrolysis of valactamide A. Chromatographic retention times of each peak are shown in red. (a) Selected ion chromatogram of  $m/z = 412.183 \pm 5$  ppm, corresponding to derivatized valine. Coinjection of derivatized L-Val and valactamide A hydrolysate gives one peak at 27.6 min ( $2^{\text{nd}}$  from top). Coinjection using D-Val gives two peaks, one for D-Val at 25.2 min and one for L-Val at 27.2 min (bottom). (b) Selected ion chromatogram of  $m/z = 426.198 \pm 5$  ppm, corresponding to derivatized isoleucine. Coinjection of L-Ile and valactamide A gives one peak at 28.9 min ( $2^{\text{nd}}$  from top). Coinjection of D-Ile and valactamide A gives two peaks, one at 26.0 min for D-Ile and one at 28.9 min for L-Ile (bottom).

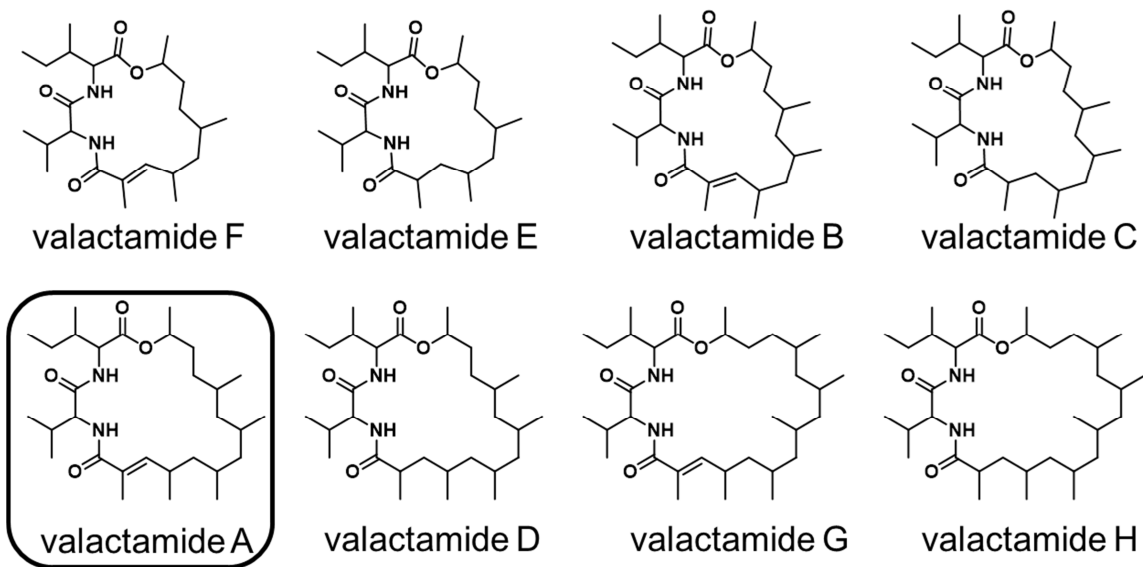

**Supplementary Figure 20. Valactamides A-H.** The family of valactamide metabolites proposed to be produced by the valactamide gene cluster is shown. The structure of valactamide A (shown in black box) was determined by NMR. The structures of the other compounds are proposed based on similarity of MS<sup>1</sup> and MS<sup>2</sup> data and molecular genetic evidence (see **Supplementary Fig. 21** and **22**).



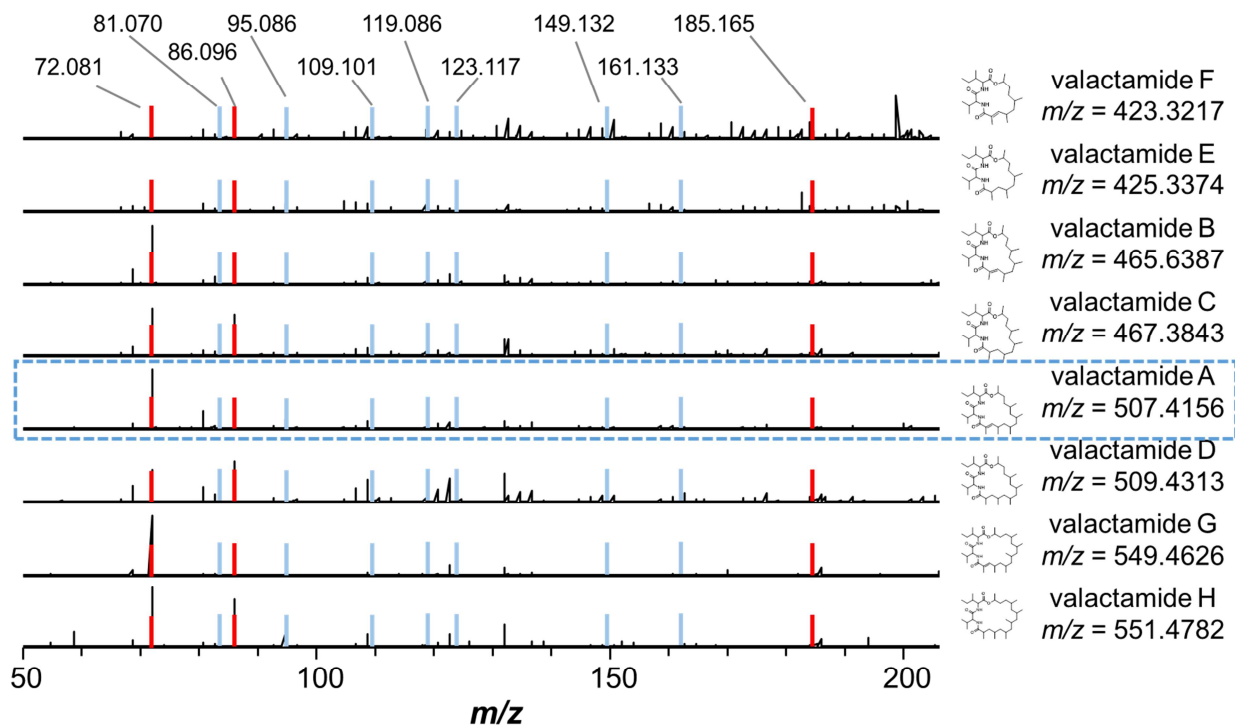

6

**Supplementary Figure 22. MS<sup>2</sup> of the valactamide family.** The 50 to 200  $m/z$  region from MS<sup>2</sup> for valactamides A-H is shown. Selected fragments which are the same within <1 ppm across each family member are highlighted with sticks. Red sticks correspond to diagnostic fragment ions for Val, Ile, and the Val-Ile dipeptide (amino acid derived fragment structures shown in **Supplementary Figure 11**). Valactamide A is highlighted with a blue box.

```

x1 <- xcmsSet(method="centWave", ppm=3, peakwidth=c(20,100), snthresh=10, prefilter=c(5,10000),
mzCenterFun="wMean", integrate=1, mzdiff=0.001, fitgauss=FALSE, noise=1000, sleep=0,
verbose.columns=FALSE, nSlaves=4)
#Grouping
x2 <- group(x1, bw=30, minfrac=0.5, mzwid=0.01)
#writing grouping output
dat <- groupval(x2, "medret", "into")
rownames(dat) <- groupnames(x2, mzdec=4, rtdec=0)
dat <- rbind(group=as.character(phenoData(x2)$class), dat)
write.csv(dat, file="groupedoutput.csv")
#retention time correction
x3 <- retcor(x2, family="s", plottype="m")
#regroup after retcor
x4 <- group(x3, bw=30, minfrac=0.5, mzwid=0.01)
#re-write file after retcor
dat2 <- groupval(x4, "medret", "into")
rownames(dat2) <- groupnames(x4, mzdec=4, rtdec=0)
dat2 <- rbind(group=as.character(phenoData(x4)$class), dat2)
write.csv(dat2, file="groupedoutput.csv")
# peakfilling
pkfill <-x4
pkfill@profinfo$step <- 0.001
pkfill2 <-fillPeaks(pkfill)
#load camera
library(CAMERA)
#running camera
x5 <-xsAnnotate(pkfill2)
x6 <-groupFWHM(x5, perfwhm=0.6)
x7 <-groupCorr(x6)
x8 <-findIsotopes(x7)
x9 <-findAdducts(x8, polarity="positive")
write.csv(getPeaklist(x9), file="resultCAMERA.csv")

```

**Supplementary Figure 23. XCMS Commands.** Commands used in R for feature detection and annotation of untargeted LC-MS data using XCMS and CAMERA.

**Supplementary Table 1. AtFAC9J20 sequence comparison with genomic reference strain *A. terreus* NIH 2624.** The strain actually used to generate AtFAC9J20 was ATCC20542.

| <b>AtFAC9J20</b>               | <b>NIH 2624</b>      | <b>Large Variations</b>                    | <b>Location</b>       |
|--------------------------------|----------------------|--------------------------------------------|-----------------------|
| 102,551 -102,722<br>(Telomere) | no data              | NA                                         | NA                    |
| 66,920 - 102,550               | no data              | NA                                         | NA                    |
| 48,773 - 66,919                | 42,395 - 60,545      | 10bp duplication in this strain            | intergenic            |
| 40,000 - 48,772                | missing              | (+)8,773 bp                                | intergenic            |
| 34,242 - 39,999<br>missing     | 36,648 - 42,404      | (-)344bp                                   | intergenic            |
| 31,774 - 34,248<br>missing     | 33,830 - 36,303      | 7bp duplication in the NIH strain          |                       |
| 23,337 - 31,881<br>missing     | 33,724 - 33,829      | (-)106bp                                   | intergenic            |
| 23,066 - 23,338<br>missing     | 25,175 - 33,723      | 2bp duplication in this strain             | intergenic            |
| 15,815 - 23,065<br>missing     | 24,806 - 25,174      | (-)369bp                                   | intergenic            |
| 14,667 - 15,813                | 23,066 - 23,338      | 265bp Inversion                            | intergenic            |
|                                | 24,445 - 24,540      | (-)96bp                                    | intergenic            |
|                                | 17,183 - 24,444      |                                            |                       |
|                                | 15,332 - 17,182      | (+)2bp and (-)1,851bp                      | intergenic            |
|                                | 14,166 - 15,331      |                                            |                       |
| 13,926 -14,666                 | missing              | (+)741bp and (-)8bp                        | A10 (14,101 - 14,925) |
| 6854-13925<br>1-7237           | 7072-14159<br>1-7248 | 207 or 225bp duplication in the NIH strain | A11 (7,736 - 6,762)   |

**Supplementary Table 2. Summary of open reading frames on the FAC, AtFAC9J20.**

| Gene Name    | <i>A. terreus</i><br>NIH2624<br>homolog      | Start | Stop  | Predicted<br>domains (CDD)                 | Deletant<br>Made? |
|--------------|----------------------------------------------|-------|-------|--------------------------------------------|-------------------|
| <i>benX</i>  | None                                         | 91734 | 90495 | SAM binding                                | Yes               |
| <i>benY</i>  | None                                         | 86362 | 89695 | NRPS: A-T-C                                | Yes               |
| <i>benZ</i>  | None                                         | 84859 | 77576 | NRPS: A-T-C-A-<br>T-C                      | Yes               |
| <i>valB</i>  | ATEG_03576                                   | 58960 | 66874 | NRPS: C-A-T-C-<br>A-T-C                    | Yes               |
| <i>valA</i>  | ATEG_03575<br>and<br>ATEG_03574 <sup>a</sup> | 57999 | 50187 | PKS: KS-AT-DH-<br>Mtase-ER-KR-<br>PP       | Yes               |
| AtFAC9J20_6  | ATEG_03573                                   | 37549 | 36224 | TRI7-like toxin<br>biosynthesis<br>protein | No                |
| AtFAC9J20_7  | ATEG_03571                                   | 28172 | 27526 | None                                       | No                |
| AtFAC9J20_8  | None                                         | 33718 | 34061 | None                                       | No                |
| AtFAC9J20_9  | ATEG_03570                                   | 25661 | 25386 | BBE domain                                 | No                |
| AtFAC9J20_10 | ATEG_03569                                   | 24016 | 24968 | acetyltransferase                          | No                |
| <i>sttA</i>  | ATEG_03568                                   | 20124 | 22740 | Isoprenoid C1<br>superfamily               | Yes               |
| <i>sttB</i>  | ATEG_03567                                   | 19694 | 17673 | p450 superfamily                           | Yes               |
| AtFAC9J20_13 | None                                         | 14107 | 14931 | None                                       | Yes               |
| AtFAC9J20_14 | ATEG_03566                                   | 10961 | 12219 | SUR7 –<br>transmembrane                    | No                |
| AtFAC9J20_15 | None                                         | 10154 | 9035  | None                                       | No                |
| AtFAC9J20_16 | None                                         | 7254  | 6768  | None                                       | No                |
| AtFAC9J20_17 | ATEG_03564                                   | 5109  | 6241  | Tyrosinase<br>superfamily                  | No                |
| AtFAC9J20_18 | ATEG_03563                                   | 3898  | 1120  | NRPS: A-T-TE                               | No                |
| AtFAC9J20_19 | None                                         | 153   | 611   | None                                       | No                |

<sup>a</sup> Previously mis-annotated as two genes, correctly annotated here as one gene, *valA*



**Supplementary Table 3. AtFAC9J20 Deletants.**

| <b>Deletant Name</b> | <b>Genes Deleted</b>                | <b>Benzomalvin A/D Detected?</b> | <b>Terpenoid Detected?</b> | <b>Valactamide A Detected?</b> |
|----------------------|-------------------------------------|----------------------------------|----------------------------|--------------------------------|
| null                 | <i>benX, benY, benZ, valB, valA</i> | No                               | Yes                        | No                             |
| $\Delta benX$        | <i>benX</i>                         | Yes                              | Yes                        | Yes                            |
| $\Delta benY$        | <i>benY</i>                         | No                               | Yes                        | Yes                            |
| $\Delta benz$        | <i>benZ</i>                         | No                               | Yes                        | Yes                            |
| $\Delta valB$        | NRPS <i>valB</i>                    | Yes                              | Yes                        | No                             |
| $\Delta valA$        | PKS <i>valA</i>                     | Yes                              | Yes                        | No                             |
| $\Delta sttA$        | Terpene synthase <i>sttA</i>        | Yes                              | No                         | Yes                            |
| $\Delta sttB$        | Cytochrome P450 <i>sttB</i>         | Yes                              | No                         | Yes                            |

**Supplementary Table 4. Extracted Adenylation Domain Signatures of NRPS genes encoded by AtFAC9J20.**

| <b>Domain</b>          | <b>Extracted A-domain Signature</b> | <b>Predicted Amino Acid</b> |
|------------------------|-------------------------------------|-----------------------------|
| BenY- <b>A</b> TC      | GMFIVGLGMK                          | Anth                        |
| BenZ- <b>A</b> TCATC   | GINFIGAGTK                          | Anth                        |
| BenZ-ATC <b>A</b> TC   | DMNVMGGVTK                          | Phe, NmPhe, Tyr             |
| ValB- C <b>A</b> TCATC | DALLLGITIK                          | Branched Aliphatic          |
| ValB- CATC <b>A</b> TC | DLGFSGPIIK                          | Branched Aliphatic          |

**Supplementary Table 5. Annotated <sup>1</sup>H and <sup>13</sup>C chemical shifts for valactamide A (CDCl<sub>3</sub>, <sup>a</sup>600 MHz and <sup>b</sup>150 MHz).**

| Position | <sup>a</sup> δ <sub>C</sub> , mult. | <sup>b</sup> δ <sub>H</sub> , mult. (J in Hz)               |
|----------|-------------------------------------|-------------------------------------------------------------|
| 1        | 171.2, C                            |                                                             |
| 2        | 57.3, CH                            | 4.28, dd (6.5, 6.2)                                         |
| 3        | 37.4, CH                            | 1.90, m                                                     |
| 4        | 15.1, CH <sub>3</sub>               | 0.87, d (6.9)                                               |
| 5        | 25.9, CH <sub>2</sub>               | 1.20, m; 1.51, m                                            |
| 6        | 11.5, CH <sub>3</sub>               | 0.94, dd (7.4, 7.3)                                         |
| 7        | 170.9, C                            |                                                             |
| 8        | 58.8, CH                            | 4.33, dd (7.6, 5.0)                                         |
| 9        | 30.2, CH                            | 2.33, ddd (6.9, 6.8, 5.0)                                   |
| 10       | 17.5, CH <sub>3</sub>               | 0.93, d (6.8)                                               |
| 11       | 19.6, CH <sub>3</sub>               | 1.02, d (6.9)                                               |
| 12       | 169.4, C                            |                                                             |
| 13       | 128.2, C                            |                                                             |
| 14       | 12.6, CH <sub>3</sub>               | 1.93, d (0.9)                                               |
| 15       | 144.6, CH                           | 6.34, dq (10.2, 0.9)                                        |
| 16       | 30.8, CH                            | 2.57, dddd (10.6, 10.2, 6.7, 2.6)                           |
| 17       | 20.9, CH <sub>3</sub>               | 0.96, d (6.7)                                               |
| 18       | 46.1, CH <sub>2</sub>               | 1.12, ddd (13.0, 10.6, 3.4);<br>1.37, ddd (13.0, 10.9, 2.6) |
| 19       | 29.0, CH                            | 1.28, m                                                     |
| 20       | 19.5, CH <sub>3</sub>               | 0.80, d (6.3)                                               |
| 21       | 48.0, CH <sub>2</sub>               | 0.94, m; 1.00, ddd (13.4, 7.6, 5.1)                         |
| 22       | 28.4, CH                            | 1.49, m                                                     |
| 23       | 21.2, CH <sub>3</sub>               | 0.81, d (6.5)                                               |
| 24       | 44.8, CH <sub>2</sub>               | 0.82, m; 1.26, ddd (13.6, 9.4, 3.3)                         |
| 25       | 29.9, CH                            | 1.48, m                                                     |
| 26       | 20.8, CH <sub>3</sub>               | 0.86, d (6.6)                                               |
| 27       | 30.5, CH <sub>2</sub>               | 0.99, m; 1.44, m                                            |
| 28       | 32.6, CH <sub>2</sub>               | 1.43, m; 1.62, m                                            |

|      |                       |                           |
|------|-----------------------|---------------------------|
| 29   | 72.5, CH              | 4.93, ddd (7.0, 6.4, 4.4) |
| 30   | 20.3, CH <sub>3</sub> | 1.23, d (6.4)             |
| HN-I |                       | 6.56, d (6.2)             |
| HN-V |                       | 6.18, d (7.5)             |

**Supplementary Table 6. Relative Abundance of valactamide metabolites.**

| Metabolite    | Molecular Formula                                             | Exact Mass | # ketides | Abundance |
|---------------|---------------------------------------------------------------|------------|-----------|-----------|
| valactamide A | C <sub>30</sub> H <sub>54</sub> N <sub>2</sub> O <sub>4</sub> | 506.4084   | 7         | 94 %      |
| valactamide B | C <sub>27</sub> H <sub>48</sub> N <sub>2</sub> O <sub>4</sub> | 464.3614   | 6         | 3.0%      |
| valactamide C | C <sub>27</sub> H <sub>50</sub> N <sub>2</sub> O <sub>4</sub> | 466.3771   | 6         | 1.4%      |
| valactamide D | C <sub>30</sub> H <sub>56</sub> N <sub>2</sub> O <sub>4</sub> | 508.4240   | 7         | 0.94%     |
| valactamide E | C <sub>24</sub> H <sub>44</sub> N <sub>2</sub> O <sub>4</sub> | 424.3301   | 5         | 0.099%    |
| valactamide F | C <sub>24</sub> H <sub>42</sub> N <sub>2</sub> O <sub>4</sub> | 422.3145   | 5         | 0.027%    |
| valactamide G | C <sub>33</sub> H <sub>60</sub> N <sub>2</sub> O <sub>4</sub> | 548.4553   | 8         | 0.018%    |
| valactamide H | C <sub>33</sub> H <sub>62</sub> N <sub>2</sub> O <sub>4</sub> | 550.4710   | 8         | 0.00043%  |

**Supplementary Table 7. FAC clones containing 56 full-length BGCs.**

| Fungal species      | Cluster No. | FAC Name  | FAC Location<br>(Chr: position)        | FAC Size (bp) |
|---------------------|-------------|-----------|----------------------------------------|---------------|
| <i>A. aculeatus</i> | 9           | AaFAC1K8  | 7:483343-596987                        | 113,644       |
| <i>A. aculeatus</i> | 19          | AaFAC1J4  | 25:37-110883                           | 110,846       |
| <i>A. aculeatus</i> | 21_22       | AaFAC1D8  | 1:78626-186378                         | 107,752       |
| <i>A. aculeatus</i> | 1_25        | AaFAC2P10 | 8:211037-336059                        | 125,022       |
| <i>A. aculeatus</i> | 30          | AaFAC6A16 | 16:18608-112106                        | 93,498        |
| <i>A. aculeatus</i> | 32          | AaFAC8A16 | 1:2370038-2483583                      | 113,545       |
| <i>A. aculeatus</i> | 34          | AaFAC10A5 | 4:1981-104478                          | 102,497       |
| <i>A. aculeatus</i> | 35          | AaFAC10D7 | 5:13457-135109                         | 121,652       |
| <i>A. aculeatus</i> | 39          | AaFAC1L21 | 18:355848-455803                       | 99,955        |
| <i>A. aculeatus</i> | 40          | AaFAC3D12 | 22:235518-338083                       | 102,565       |
| <i>A. aculeatus</i> | 41          | AaFAC2P8  | 4:870643-1011680                       | 141,037       |
| <i>A. terreus</i>   | 7           | AtFAC8P6  | 2:37278-154428                         | 117,150       |
| <i>A. terreus</i>   | 8           | AtFAC5P8  | 2:175456-236080                        | 60,624        |
| <i>A. terreus</i>   | 10          | AtFAC6H11 | 3:7234-82997                           | 75,763        |
| <i>A. terreus</i>   | 12          | AtFAC8G17 | 3:1480896-1564240                      | 83,344        |
| <i>A. terreus</i>   | 20          | AtFAC9J20 | 4:2151734-the missing<br>telomeric end | 102,722       |
| <i>A. terreus</i>   | 29          | AtFAC3E2  | 8:1151835-1242603                      | 95,425        |
| <i>A. terreus</i>   | 31          | AtFAC9M17 | 8:1557569-1681014                      | 123,445       |
| <i>A. terreus</i>   | 35          | AtFAC9B9  | 10:388955-491178                       | 102,223       |
| <i>A. terreus</i>   | 36          | AtFAC9H19 | 10:590841-687211                       | 96,370        |
| <i>A. terreus</i>   | 37          | AtFAC4N23 | 10:1162818-1274448                     | 111,630       |
| <i>A. terreus</i>   | 38          | AtFAC7O19 | 10:1344783-1469927                     | 125,144       |
| <i>A. terreus</i>   | 39          | AtFAC5N15 | 10:1464244-1565353                     | 101,109       |
| <i>A. terreus</i>   | 40          | AtFAC5L7  | 11:189737-313873                       | 124,136       |
| <i>A. terreus</i>   | 46          | AtFAC5B9  | 13:398169-522253                       | 124,084       |
| <i>A. terreus</i>   | 48          | AtFAC5E10 | 14: 6368-97532                         | 91,164        |
| <i>A. terreus</i>   | 49          | AtFAC6I22 | 14:10646-148251                        | 137,605       |
| <i>A. terreus</i>   | 51          | AtFAC7M4  | 14:179105-281612                       | 102,507       |
| <i>A. terreus</i>   | 53          | AtFAC6N3  | 15:324192-439862                       | 115,670       |
| <i>A. wentii</i>    | 1           | AwFAC4O2  | 2:748867-861001                        | 112,134       |
| <i>A. wentii</i>    | 2           | AwFAC1K8  | 4:96694-210549                         | 113,855       |
| <i>A. wentii</i>    | 3           | AwFAC2F10 | 10:572788-655030                       | 82,242        |
| <i>A. wentii</i>    | 4           | AwFAC4E11 | 1:2038648-2143968                      | 105,320       |
| <i>A. wentii</i>    | 5           | AwFAC4L5  | 2:1829642-1920197                      | 90,555        |
| <i>A. wentii</i>    | 6           | AwFAC2P3  | 4:186740-312513                        | 125,773       |
| <i>A. wentii</i>    | 7           | AwFAC4I20 | 4:3165620-3255977                      | 90,357        |
| <i>A. wentii</i>    | 8           | AwFAC4D17 | 5:2466262-2562334                      | 96,072        |
| <i>A. wentii</i>    | 10          | AwFAC4D8  | 7:2270034-2350260                      | 80,226        |
| <i>A. wentii</i>    | 11          | AwFAC3M17 | 10:471140-562395                       | 91,255        |
| <i>A. wentii</i>    | 13          | AwFAC3D18 | 7:2189142-2288310                      | 99,168        |
| <i>A. wentii</i>    | 19          | AwFAC1H17 | 4:1-87455                              | 87,454        |
| <i>A. wentii</i>    | 20          | AwFAC2K17 | 1:3915914-4008958                      | 93,044        |

|                  |    |           |                   |         |
|------------------|----|-----------|-------------------|---------|
| <i>A. wentii</i> | 25 | AwFAC3E24 | 8:318322-407365   | 89,043  |
| <i>A. wentii</i> | 26 | AwFAC3L2  | 9:672348-770093   | 97,745  |
| <i>A. wentii</i> | 27 | AwFAC3B4  | 9:1507369-1620289 | 112,920 |
| <i>A. wentii</i> | 29 | AwFAC4J7  | 2:84403-199331    | 114,928 |
| <i>A. wentii</i> | 30 | AwFAC2F2  | 2:2776606-2876645 | 100,039 |
| <i>A. wentii</i> | 31 | AwFAC3D3  | 3:179174-288015   | 108,841 |
| <i>A. wentii</i> | 32 | AwFAC1B1  | 8:2015243-2105484 | 90,241  |
| <i>A. wentii</i> | 34 | AwFAC1C5  | 1:4290614-4374135 | 83,521  |
| <i>A. wentii</i> | 38 | AwFAC4H11 | 7:1563096-1662018 | 98,922  |
| <i>A. wentii</i> | 39 | AwFAC4F15 | 10:118366-207802  | 89,436  |
| <i>A. wentii</i> | 40 | AwFAC3H22 | 1:2934184-3041025 | 106,841 |
| <i>A. wentii</i> | 43 | AwFAC1J2  | 10:1-87900        | 87,899  |
| <i>A. wentii</i> | 44 | AwFAC4O4  | 2:2094226-2208140 | 113,914 |
| <i>A. wentii</i> | 47 | AwFAC4C1  | 4:1016467-1115739 | 99,272  |

**Supplementary Table 8. PCR primers used for FAC engineering in this study.**

| <b>Name</b>                                                   | <b>Sequence</b>                                                                 |
|---------------------------------------------------------------|---------------------------------------------------------------------------------|
| <b>ΔAtFAC9J20Ben-Ipt-clusters</b><br>(AtFAC9J20-null)         |                                                                                 |
| Pben-KF                                                       | TCTTTAAGACCAGCTTGAGCAGTACCTTTAGAATGCAACGGCTTTTAACC<br>CCTGTTGACAATTAATCATCGGCA  |
| Pben-KR                                                       | ACTAAAGTTTGGAGCTTGTAAGTTAATTTTTGCGTTGTTACTATTGCCTCT<br>CAGCACTGTCCTGCTCCTT      |
| <b>ΔAtFAC9J20Sesterterpenoid-cluster</b><br>(AtFAC9J20-null2) |                                                                                 |
| Poph-KF                                                       | GTGGTGGCAATCCTATCCCCGATCCTGCAGGCTCTGGAAGCTCGGGATC<br>CCCTGTTGACAATTAATCATCGGCA  |
| Poph-KR                                                       | TTAGGAGGCTTATGCTTCTTACCGGATGTTAATAAGACTGCTTTGTTAGCT<br>CAGCACTGTCCTGCTCCTT      |
| <b>ΔAtFAC9J20BenX</b>                                         |                                                                                 |
| Mtase-KF                                                      | ATGTCCGCGGTTCGAGATTCCTCACCCCTCCGGCTGCCGAGTATACGATA<br>TCCTGTTGACAATTAATCATCGGCA |
| Mtase-KR                                                      | TCACCGATGTGCGACACTTACTCTCTCGTTCCCGGACGTGAACGTCTGG<br>GTCAGCACTGTCCTGCTCCTT      |
| <b>ΔAtFAC9J20BenY</b>                                         |                                                                                 |
| NRPS1-KF                                                      | ATGGTCTCACGTAAACCAGCACTGGCAGTCAAAGAATTGGGATGCATCA<br>GCCTGTTGACAATTAATCATCGGCA  |
| NRPS1-KR                                                      | CTCATGGGGCCATTATGTTGACCAGAGCTTGTTCCGGGTGCCTCGCGAG<br>CTCAGCACTGTCCTGCTCCTT      |
| <b>ΔAtFAC9J20BenZ</b>                                         |                                                                                 |
| NRPS2-KF                                                      | TCACACTTTGATCTTGTC AACAGCTCTCCAGGCTGACTAGCAAACGCCG<br>CCTGTTGACAATTAATCATCGGCA  |
| NRPS2-KR                                                      | CATGACAAGGATAGGCTTCCAGCAGCATATCACTGGGGAGGATACTGGG<br>ATCAGCACTGTCCTGCTCCTT      |

|                                         |                                                                                  |
|-----------------------------------------|----------------------------------------------------------------------------------|
|                                         |                                                                                  |
| <b>ΔAtFAC9J20BenY-C-domain</b>          |                                                                                  |
| At20BenYCkan-F                          | GTGAGCTCTGTCTGTCGCATCTTCGGGAACAGACATCGTTGCTGGACTC<br>TCGACCTGCAGCCTGTTGACAA      |
| At20BenYCkan-R                          | GAACGCGACCCCATACGATCAATCAAAGCACCCCTTCCAATCACCATCTCA<br>GTCGAGGCTGATCAGCGA        |
| <b>ΔAtFAC9J20BenZ-C-domain</b>          |                                                                                  |
| At20BenZCkan-F                          | ATGATACATTCTGGGTGGTGGATGTACCCTCCTCCGGAAGAGATAGATC<br>ACGACCTGCAGCCTGTTGACAA      |
| At20BenZCkan-R                          | TTGACGGTGAGCTCCGTGCAGTGGCAACGCGCGAGCTAGTCAGCCGCG<br>GCGTCGAGGCTGATCAGCGA         |
| <b>ΔAtFAC9J20valB</b>                   |                                                                                  |
| NRPS3-KF                                | ATGGCGGACGGAGCTGACTATACCCAACGCAATATCCATTCTCTCGACT<br>CCCTGTTGACAATTAATCATCGGCA   |
| NRPS3-KR                                | TCATGATGCTGCTTCGATGATGAATCTGCCAGTGCCGGCGTTGTTATGC<br>GTCAGCACTGTCCTGCTCCTT       |
| <b>ΔAtFAC9J20valA</b>                   |                                                                                  |
| PKS-KF                                  | ATGAGCCTTCCAGCACAGTCCCCAATTGCCGTCTGTTGGGCGTTGCATACA<br>GCCTGTTGACAATTAATCATCGGCA |
| PKS-KR                                  | TCAAGAGACGCATGTTTCCTTCCCCTTTAACCCCTGAGCCACGATCCGACT<br>TCAGCACTGTCCTGCTCCTT      |
| <b>ΔAtFAC9J20-A<sub>TEG_03569</sub></b> |                                                                                  |
| 20t03569-kF                             | CTCTTCTCCCGCTTAGAGCTTATACCAAGCACTGTCTGTTCCCTGCCAAA<br>CGACCTGCAGCCTGTTGA         |
| 20t03569-kR                             | GAAACCTTCCAATACAGTATGGGTGATCAAACAACCTGTGCATTCTATATA<br>GTCGAGGCTGATCAGCGA        |
| <b>ΔAtFAC9J20-A<sub>TEG_03568</sub></b> |                                                                                  |

|                                      |                                                                             |
|--------------------------------------|-----------------------------------------------------------------------------|
| 20DMAT-kF                            | TCAGTACCATAACAAGGTGATAACATTTTCAATTTGGCTGGCTCGTCAA<br>CGACCTGCAGCCTGTTGA     |
| 20DMAT-kR                            | CCTACATTAAGAACTAACAAACACATGCACCAAATATTACCACAGCAGA<br>GTCGAGGCTGATCAGCGA     |
| <b>ΔAtFAC9J20-<br/>ATEG_03567</b>    |                                                                             |
| 20DMAT2-kF                           | GTTGAAGCACAACCTTCGTACACCTGCCAATAGCATGATAATCGTCTCCT<br>CGACCTGCAGCCTGTTGA    |
| 20DMAT2-kR                           | AGACATACGCATATGTCCTGCCGGAACGATACCTGGAGAAAATCAAGAA<br>CGTCGAGGCTGATCAGCGA    |
| <b>ΔAtFAC9J20-<br/>ATEG_03573</b>    |                                                                             |
| At20-71Kan-F                         | ATGAGCTTATTGCATCCACTTTTAGTGCAGCTGATTGCTTTGGCACTTCC<br>CGACCTGCAGCCTGTTGACAA |
| At20-71Kan-R                         | TCAGATGTTTATAACCAATGTGACGCCAAATAAGCAGTGTTTCCTGTCGCCA<br>GTCGAGGCTGATCAGCGA  |
| <b>ΔAtFAC36-9H19-<br/>ATEG_07067</b> |                                                                             |
| At36-7kan-F                          | AGTTTATCGCCTCGTCCGATTTCTGTTTGCGGCCTACACTCCACATATA<br>CGACCTGCAGCCTGTTGACAA  |
| At36-7kan-R                          | CATATAATATGGCACTTAATAAATTCTAGAGTACAGGCTGTCTGTCAGGC<br>GTCGAGGCTGATCAGCGA    |
| <b>ΔAtFAC38-7O19-<br/>ATEG_07358</b> |                                                                             |
| At38NRPS-kF                          | CTCATAATCGGAAGTATCATTGCTTGCATCTCAGCCACTAGCTCGTCTAT<br>CGACCTGCAGCCTGTTGA    |
| At38NRPS-kR                          | GATTCATCAGAATACCTCTTTTCGCCAGCTCTCATTGTCGCGAAATCAAT<br>GTCGAGGCTGATCAGCGA    |
| <b>ΔAtFAC39-5N15-<br/>ATEG_07380</b> |                                                                             |
| At39-80kan-F                         | CTGTTGCAAGAAACCTTGACCCGTCTTGAAGTGTTCTGAGTCTACTCACC<br>CGACCTGCAGCCTGTTGACAA |



|                                            |                                                                             |
|--------------------------------------------|-----------------------------------------------------------------------------|
| At39-80kan-R                               | ATGTCAATTGGGAGCCACGAGAAGGACTGCCACTTCGTCAGCTGCGTTC<br>CGTCGAGGCTGATCAGCGA    |
| <b>ΔAaFAC30-6A16-<br/>Aacu16872_046595</b> |                                                                             |
| Aa30NRPSkan-F                              | GACTAAAGATTCAAGGATTGAGGGAAATAGACTCATAAACTCAGTTGTC<br>CGACCTGCAGCCTGTTGACAA  |
| Aa30NRPSkan-R                              | CCTTCATATATATCGTATCATCCTGAGGTTCTATGACCTCTGTGGGGCCT<br>GTCGAGGCTGATCAGCGA    |
| <b>ΔAaFAC35-10D7-<br/>Aacu16872_51108</b>  |                                                                             |
| Aa35PKSkan-F                               | ACTATCCTCATATCCAACAGTGCCATTCTGGTTAAAGAGATAATCTCCAC<br>CGACCTGCAGCCTGTTGACAA |
| Aa35PKSkan-R                               | GATCGAGCATTGGATTGTTTACAAACACAGCATAGAGGTAAGATAATAGA<br>GTCGAGGCTGATCAGCGA    |
| <b>ΔAaFAC39-1L21-<br/>Aacu16872_054820</b> |                                                                             |
| Aa39PKSkan-F                               | GTCAGGATGACCACCTATCGGGAACATTCAGTCCTACCGCAGTATGTGG<br>CCGACCTGCAGCCTGTTGACAA |
| Aa39PKSkan-R                               | AACTCCAAAGCACATCCCGCGCAGCTTCATGCCCAACCTTAACAACCAAC<br>GTCGAGGCTGATCAGCGA    |
| <b>ΔAaFAC41-2P8-<br/>Aacu16872_058515</b>  |                                                                             |
| Aa41NRPSkab-F                              | TCAAACCGAACGAAATAGCTTGAGATCTTATTTTCAGACCGACATCGAAA<br>CGACCTGCAGCCTGTTGACAA |
| Aa41NRPSkab-R                              | CAAACCCCATCCGTTTTCCCGCCCCATTCCGCTATCAGCCCTAAGCCGC<br>CGTCGAGGCTGATCAGCGA    |
| <b>ΔAwFAC2-1K8-<br/>Aspwe1_0027400</b>     |                                                                             |
| Aw2-400kan-F                               | GTTTCCCTTTTTTCCAACATTAACCAACTTTCTGACCAATAACACCAATC<br>GACCTGCAGCCTGTTGACAA  |
| Aw2-400kan-R                               | TATTCAATGTGTCATCGTGGATTGTTCCCTGGTTACTTCATTCAGATGCATG<br>TCGAGGCTGATCAGCGA   |

|                                          |                                                                              |
|------------------------------------------|------------------------------------------------------------------------------|
|                                          |                                                                              |
| <b>ΔAwFAC4-4E11-<br/>Aspwe1_0034272</b>  |                                                                              |
| Aw4-72kan-F                              | TCTAGTGGATCACATGTACCAGCTGAACCTGAAGCTGAATGCCGGTCCAG<br>GCGACCTGCAGCCTGTTGACAA |
| Aw4-72kan-R                              | CCCCAACATGAAAACAATCTAGCTGTAGTACTCCTCCATCCAAGACCTCA<br>GTCGAGGCTGATCAGCGA     |
| <b>ΔAwFAC8-4D17-<br/>Aspwe1_0042597</b>  |                                                                              |
| Aw8-97kan-F                              | ACGTCAAGTGCGATACAAACAAGAGCAAACTAACGACAGCGGAATCAT<br>CCGACCTGCAGCCTGTTGACAA   |
| Aw8-97kan-R                              | CATCGCATAAGACATTATCCATAAATACTACCAACTTGATACCAATTCAG<br>TCGAGGCTGATCAGCGA      |
| <b>ΔAwFAC10-4D8-<br/>Aspwe1_0044725</b>  |                                                                              |
| Aw10-25kan-F                             | GCAGCCCCTGCGTACTCTGTACGCCGCAGATTCACCCCAAAGCACGCAA<br>GCGACCTGCAGCCTGTTGACAA  |
| Aw10-25kan-R                             | GAATAGCGCTTTGCAAACACTTTCAACAGAACTGTCAGTGCTACACCCCA<br>GTCGAGGCTGATCAGCGA     |
| <b>ΔAwFAC19-1H17-<br/>Aspwe1_0085322</b> |                                                                              |
| Aw19-22kan-F                             | ACGATCTCTCTCTCCTGCAGTCCAAGTATCTGCCTGAAGCAGGGATCAAA<br>CGACCTGCAGCCTGTTGACAA  |
| Aw19-22kan-R                             | GCTTGATATCTGAAGATCCGTTGAAACAGACATCCAACGTCTGGCGGAA<br>CGTCGAGGCTGATCAGCGA     |
| <b>ΔAwFAC27-3B4-<br/>Aspwe1_0121409</b>  |                                                                              |
| Aw27-09kan-F                             | GCTCGTATTTGCTATTATGTAACAGTTGCTAAAGCTCTTGCTCCCTTGAC<br>GACCTGCAGCCTGTTGACAA   |
| Aw27-09kan-R                             | GTATTGTACACAGGTATCCTTAAACAATAGTAACACAAACAGACGATCCA<br>GTCGAGGCTGATCAGCGA     |

|                                         |                                                                             |
|-----------------------------------------|-----------------------------------------------------------------------------|
| <b>ΔAwFAC31-3D3-<br/>Aspwe1_0151732</b> |                                                                             |
| Aw31-32kan-F                            | TGGGCATCGATTCAATTGCTTGATTGCAAAAGCTTGTGGACGCAAGA<br>ACTCGACCTGCAGCCTGTTGACAA |
| Aw31-32kan-R                            | ATGCATTCAAGATAGAGTCCTTGTCCAACTCAACTCGACCGTGTTGATC<br>GTCGAGGCTGATCAGCGA     |
| <b>ΔAwFAC32-1B1-<br/>Aspwe1_0163793</b> |                                                                             |
| Aw32-93kan-F                            | TAGCACGGGTTTTTGTGATCTCTGTGTCTGGCTGTATAATATTCATAGTC<br>GACCTGCAGCCTGTTGACAA  |
| Aw32-93kan-R                            | ACGAATCAATATATACAAGGTCAAGAGGCAGGCCTGCCATCTTATACGTT<br>GTCGAGGCTGATCAGCGA    |
| <b>ΔAwFAC43-1J2-<br/>Aspwe1_0294248</b> |                                                                             |
| Aw43-48kan-F                            | ATGCCATTCTTGCGGTGCACAACACCGGCTGTAGTCCGGCTTTAATAGC<br>CCGACCTGCAGCCTGTTGACAA |
| Aw43-48kan-R                            | TTCGGTGGCTTTGAGGGAGTCAACTGTGACATGTTAGCATAACATCATATG<br>GTCGAGGCTGATCAGCGA   |
